1 **Loss of function of the mitochondrial peptidase PITRM1 induces**  
2 **proteotoxic stress and Alzheimer's disease-like pathology in human**  
3 **cerebral organoids**

4 Dina Ivanyuk<sup>1,2#</sup>, María José Pérez<sup>1,2#</sup>, Vasiliki Panagiotakopoulou<sup>1,2</sup>, Gabriele Di  
5 Napoli<sup>1,2</sup>, Dario Brunetti<sup>3</sup>, Rawaa Al-Shaana<sup>1,4</sup>, Stephan A. Kaeser<sup>1,4</sup>, Mathias  
6 Jucker<sup>1,4</sup>, Massimo Zeviani<sup>3</sup>, Carlo Viscomi<sup>3</sup>, Michela Deleidi<sup>1,2\*</sup>.

7

8 1, German Center for Neurodegenerative Diseases (DZNE), Tübingen, Germany.

9 2, Department of Neurodegenerative Diseases, Hertie Institute for Clinical Brain Research,  
10 University of Tübingen, Tübingen, Germany.

11 3, MRC-Mitochondrial Biology Unit, Cambridge CB2 0XY, UK.

12 4, Department of Cellular Neurology, Hertie Institute for Clinical Brain Research, University of  
13 Tübingen, Tübingen, Germany.

14

15

16 #, These authors contributed equally to the work

17

18 Manuscript correspondence:

19 Michela Deleidi, MD, PhD

20 German Center for Neurodegenerative Diseases (DZNE) Tübingen within the Helmholtz  
21 Association, Department of Neurodegenerative Diseases, University of Tübingen

22 Otfried-Müller. Str 23

23 72076 Tübingen-Germany

24 Tel.: +49 7071 9254200

25 Fax: +49 7071 9254074

26

27

28

29

30

31

32

33

34

35

36

37

38

39 **Abstract**

40 Mutations in pitrilysin metallopeptidase 1 (*PITRM1*), a mitochondrial protease  
41 involved in mitochondrial precursor processing and degradation, result in a slow-  
42 progressive syndrome, characterized by cerebellar ataxia, psychotic episodes and  
43 obsessive behavior as well as cognitive decline. To investigate the pathogenetic  
44 mechanisms of mitochondrial presequence processing, we employed cortical  
45 neurons and cerebral organoids generated from *PITRM1* knockout human induced  
46 pluripotent stem cells (iPSCs). *PITRM1* deficiency strongly induced mitochondrial  
47 unfolded protein response (UPR<sup>mt</sup>) and enhanced mitochondrial clearance in iPSC-  
48 derived neurons. Furthermore, we observed increased levels of amyloid precursor  
49 protein and amyloid  $\beta$  in *PITRM1* knockout neurons. However, neither cell death nor  
50 protein aggregates were observed in 2D iPSC-derived cortical neuronal cultures. On  
51 the contrary, cerebral organoids generated from *PITRM1* knockout iPSCs  
52 spontaneously developed over time pathological features of Alzheimer's disease  
53 (AD), including accumulation of protein aggregates, tau pathology, and neuronal cell  
54 death. Importantly, we provide evidence for a protective role of UPR<sup>mt</sup> and  
55 mitochondrial clearance against impaired mitochondrial presequence processing and  
56 proteotoxic stress. In summary, we propose a novel concept of *PITRM1*-linked  
57 neurological syndrome whereby defects of mitochondrial presequence processing  
58 induce an early activation of UPR<sup>mt</sup> that, in turn, modulates cytosolic quality control  
59 pathways. Thus our work supports a mechanistic link between mitochondrial  
60 function and common neurodegenerative proteinopathies.

61

62

63

64

65

66

67

68

69

70

71

72

73

## 74 Introduction

75 Mitochondrial dysfunction has been described as a common hallmark of neurological  
76 diseases <sup>1</sup>. However, mitochondria are often considered to be a secondary target,  
77 rather than the actual disease driver in these conditions. We have recently described  
78 three independent families carrying missense loss of function mutations in *pitrilysin*  
79 *metallopeptidase 1* (PITRM1), resulting in an age-dependent, progressive,  
80 neurological syndrome <sup>2, 3</sup>. Patients suffer from progressive cerebellar dysfunction  
81 leading to cerebellar atrophy, and psychiatric manifestations including obsessive  
82 behavior, anger attacks, and psychosis <sup>2, 3</sup>. Interestingly, some of these patients  
83 showed a deterioration of their cognitive functions with a slow progression till their  
84 late sixties <sup>2, 3</sup>. Human PITRM1, also known as presequence peptidase (hPreP), is a  
85 nuclear-encoded mitochondrial gene, expressed in a number of tissues, including  
86 muscles and different brain regions, e.g. cortex, hippocampus, cerebellum, and  
87 tectum <sup>4</sup>. PITRM1 was initially identified in *Arabidopsis thaliana* as a protease that  
88 degrades targeting peptides in mitochondria and chloroplasts <sup>5</sup>. Human PITRM1 is a  
89 mitochondrial matrix enzyme that digests the mitochondrial-targeting sequences  
90 (MTS) of proteins imported across the inner mitochondrial membrane, after their  
91 cleavage from protein precursors by the mitochondrial matrix presequence peptidase  
92 (MPP). When the MTS are not properly degraded, they accumulate within the  
93 mitochondrial matrix causing dissipation of the mitochondrial membrane potential  
94 and mitochondrial dysfunction <sup>6, 7</sup>. The incomplete processing of mitochondrial  
95 preproteins leads to their destabilization, resulting in alterations of mitochondrial  
96 proteostasis <sup>8</sup>. *In vitro* studies using recombinant PITRM1 have shown that, besides  
97 MTS, the enzyme is also involved in the degradation of short, unstructured peptides  
98 and amyloid beta (A $\beta$ ) peptides <sup>8-11</sup>. Interestingly, A $\beta$  peptides inhibit the activity of  
99 CYM1, the PITRM1 orthologue in yeast, leading to accumulation of precursor  
100 proteins <sup>8</sup>. Experimental work in mouse models supports a causal role for PITRM1 in  
101 neurodegenerative dementia, whereby loss of PITRM1 function leads to a  
102 progressive, neurodegenerative phenotype characterized by hindlimb claspings,  
103 impairment in motor coordination, and basal-ganglia related movement control <sup>2</sup>.  
104 Interestingly, PITRM1 deficient mice show an age-dependent accumulation of  
105 amyloid precursor protein (APP) and A $\beta$  deposits within the brain <sup>2</sup>, suggesting a link  
106 between defects of mitochondrial proteostasis and adult-onset neurodegenerative  
107 dementia. However, due to the embryonic lethality observed in complete PITRM1  
108 knockout mice, the exact role of PITRM1 in brain homeostasis and disease could not  
109 be studied <sup>2</sup>. Since PITRM1 is involved in the degradation of MTS, as well as A $\beta$   
110 peptides <sup>8</sup>, the pathomechanisms of neurodegeneration linked to loss of PITRM1

111 function could in principle be due to either accumulation of A $\beta$  peptides in  
112 mitochondria, MTS-driven toxicity, or a combination of both. Identifying the  
113 mechanisms that lead to neurodegeneration in primary mitochondrial diseases  
114 characterized by defects of mitochondrial proteostasis, such as PITRM1-linked  
115 neurological syndrome, may help elucidate the long-debated, still unresolved,  
116 involvement of altered mitochondrial function in neurodegenerative dementia. To  
117 examine PITRM1-related pathogenetic mechanisms, we generated PITRM1-  
118 knockout human induced pluripotent stem cells (iPSCs) and examined the role of  
119 mitochondrial function and proteostasis using 2D neuronal and 3D brain-organoid  
120 model systems.

121

## 122 **Methods**

### 123 **Generation of PITRM1 knockout human iPSCs**

124 Control iPSCs (from a female non affected control, 80 years) used in this study were  
125 previously generated and characterized <sup>12</sup>. All cells used in the study were derived  
126 from patients who signed an informed consent approved by The Ethics Committee of  
127 the Medical Faculty and the University Hospital Tübingen. iPSCs were kept in culture  
128 in hESC medium <sup>12</sup>. SgRNAs targeting exon 3 and 4 of PITRM1 gene were designed  
129 using CRISPR Guide Design Tools (former [www.crispr.mit.edu](http://www.crispr.mit.edu)) and purchased from  
130 Metabion International AG (exon 3 top AGGAGCCAGGTATTTACACC, exon 3  
131 bottom GGTGTAATACCTGGCTCCT, exon 4 top TTGAGCATACCGTCCTTTGT,  
132 exon 4 bottom ACAAAGGACGGTATGCTCAA). SgRNAs were cloned into the  
133 pSpCas9(BB)-2A-Puro plasmid containing the sgRNA scaffold and puromycin-  
134 resistance under the U6 promoter (Addgene plasmid #48139). Colonies that  
135 successfully integrated sgRNA into backbone plasmid were screened and confirmed  
136 by Sanger sequencing using U6 promoter region primer. SgRNA/Cas9 plasmid was  
137 delivered into cells using Nucleofector Amaxa system (Lonza Biosciences). In brief,  
138 iPS cells were dissociated with Accutase (Sigma-Aldrich) and 10<sup>6</sup> iPSCs were  
139 nucleofected with 6 $\mu$ g of each sgRNA plasmid. Cells were then replated on MEF  
140 cells in hESC medium, without P/S, supplemented with 10 $\mu$ M ROCK Inhibitor Y-  
141 27632 2HCl. After recovery, cells were replated at density 500 cells/cm<sup>2</sup> for single  
142 cell subcloning. After recovery, iPSCs were clonally expanded and the genomic  
143 deletion was assessed by PCR and Sanger sequencing (exon 3 Fw  
144 TTCAGGCAGAAAAGCCAGTT, exon 4 Rv ACTGAATTCCAGTGGGTGTGC). The  
145 screening of possible off-target effects was performed using CRISPR Design Tools.  
146 Sequencing primers for off-target effects: (5'-3'): PPIL2 NM\_148175 Fw  
147 CCTCATGCCCTGCTTGACTC, Rv CAGGGAGCACTGTCCCAATTT; NR1D1

148 NM\_021724 Fw CAAACGAGCACACACCACAG, Rv GCTGCCCCCTTGACAGAAT;  
149 KDEL2 NM\_001100603 Fw TTGGTGGTGGTTATGCCTCA, Rv  
150 ACCACCAGAACTCCACTCG; FAM120A NM\_014612 Fw  
151 TCCTGCGGTTCTTGCTCCTCTA, Rv GCATGAATGTGTCTTCTCTGGC; TLL2  
152 NM\_031949 Fw GTGGGAGGCTGTGTGGTATT, Rv TCAAGTCCCTACCTGTGCCA;  
153 SUCO NM\_014283 Fw AATCTGGTACTATTCCGATAGCCAA, Rv  
154 CCATTCAAACAGGACACTGCTG.

155

### 156 **Cortical neuronal differentiation**

157 For the induction of cortical neurons, we used an embryoid body (EB)-based  
158 differentiation protocol, with minor modifications<sup>13</sup>. iPSC colonies were manually  
159 picked and grown for 4 d in EB media (20% KO serum replacement in DMEM/F12  
160 medium, 1% NEAA, 1% P/S). On day 5, EBs were plated onto Matrigel-coated  
161 (Corning) plate and grown for 4 more days in N2B27 media (DMEM/F12, 1X N2, 1X  
162 B27-RA, 1% NEAA, 1% P/S, 20 ng/mL bFGF). For the first 8 differentiation days,  
163 the cells were grown in the presence of 10 μM SB431542 (Ascent Scientific) and  
164 2.5 μM dorsomorphin (Sigma Aldrich). After 8 d, neural rosettes were lifted with  
165 Dispase and replated onto matrigel-coated plate and grown in N2B27 media.  
166 Secondary or tertiary rosettes were manually dissected to purify neural progenitor  
167 cells (NPCs). For cortical differentiation, NPCs were dissociated with Accutase and  
168 seeded at a density of 1,000 cells per mm<sup>2</sup> on Matrigel-coated plates in neuronal  
169 differentiation medium consisting of DMEM/F12, 1X Glutamax, 1X N2, 1X B27-RA,  
170 20 ng/mL BDNF (Peprotech), 20 ng/mL GDNF, 1 mM dibutyryl-cyclic AMP  
171 (Sigma), 200 nM ascorbic acid (Sigma). Medium was replaced every other day.

172

### 173 **Cerebral organoids culture and immunohistochemistry**

174 Cerebral organoids were generated and maintained using the protocol described by  
175 Lancaster et al.<sup>14</sup>. Where indicated, cerebral organoids were treated with 500nM  
176 ISRIB or 500 μM NMN (both from Sigma Aldrich) daily, from DIV 20 to DIV 50 or from  
177 DIV45 to DIV50 respectively. For immunostaining, organoids were washed with PBS,  
178 fixed in 4% PFA for 15 min and then equilibrated in 30% sucrose in PBS overnight at  
179 4°C. Next day, organoids were embedded in blocks with a mixture of 10%  
180 sucrose/7.5% gelatin, snap frozen, and kept at -80°C until cryosections were  
181 prepared using Leica CM 1900 instrument with 20 μm thickness. Sections were then  
182 permeabilized and blocked with 10% normal goat serum in PBS in 0.5% Triton X-100.  
183 Primary antibody incubations were performed at 4°C overnight, followed by three 10

184 min washes in PBS, and staining with AlexaFluor secondary antibodies (Invitrogen,  
185 1:1000) at room temperature for 1h. Primary antibodies included rat anti-CTIP2  
186 (1:500, Abcam ab18465), rabbit anti-TBR1 (1:500, Abcam ab31940), mouse anti- $\beta$ -  
187 III-tubulin (1:1000, Sigma-Aldrich T8328), rabbit anti- $\beta$ -III-tubulin (1:1000, Biolegend,  
188 Previously Covance # PRB-435P), chicken anti-MAP2 (1:3000, Biolegend PCK-  
189 554P), mouse anti phospho-tau (AT8 1:500, Thermofisher #MN1020), mouse anti-  
190 APP (1:500, Santa Cruz Biotechnology sc53822), mouse anti-Ubiquitin (1:100, Merck  
191 MAB1510), mouse anti-Caspase 3 (1:500, Cell Signaling Technology 9664T). For  
192 thioflavin T immunostaining, sections were stained with 10 $\mu$ M thioflavin T (Sigma-  
193 Aldrich T3516) for 15 min at room temperature and washed 3 times in PBS. Cell  
194 nuclei were stained with DAPI and slides were mounted with DAKO mounting  
195 medium (Agilent S302380-2). Images were acquired using Leica TCS SP8 confocal  
196 microscope (Leica Microsystems). For image analysis, mean of fluorescence  
197 intensity per image was calculated with Image J. For each condition, 10-15 images  
198 were acquired from at least 5 organoids from three independent experiments  
199 (cultures).

200

#### 201 **Measurement of mitochondrial membrane potential**

202 For measurement of mitochondrial membrane potential, neurons were split at a  
203 concentration of  $2 \times 10^5$  cells/well on 96-wells pre-coated with Matrigel. Cells were  
204 washed once with HBSS (Invitrogen) following incubation with 200 nM  
205 Tetramethylrhodamine Methyl ester Perchlorat (TMRM) (Invitrogen) in HBSS with 1%  
206 BSA for 30 min at 37°C. Cells were then washed twice with HBSS, detached using  
207 Accumax (Invitrogen) and kept in HBSS with 1% BSA (Sigma) for FACS analysis  
208 using MaxQuant Analyzer 10 (Miltenyi Biotec). Analysis was performed using the  
209 MACSQuantify 2.6 software (Miltenyi Biotec).

210

#### 211 **Measurement of mitochondrial Reactive Oxygen Species (mtROS)**

212 For measurement of mtROS production of iPSC-derived neurons by flow cytometry,  
213 cells were pre-incubated with N2 medium for 48 hrs. Then,  $1 \times 10^6$  cells were  
214 washed once with HBSS, incubated with 5 $\mu$ M of the superoxide indicator MitoSOX  
215 Red (Invitrogen) for 30 min at 37°C, washed twice with HBSS, dissociated using  
216 Trypsin (Invitrogen) and resuspended in 200 $\mu$ l of HBSS and 1% BSA.  
217 Cytofluorimetric analysis was performed using MACSQuant Analyzer 10 (Miltenyi  
218 Biotec).

219

220

## 221 **Seahorse XF<sup>e</sup>96 Metabolic Flux Analysis**

222 Oxygen consumption rate (OCR) was analyzed using an XFp Extracellular Flux  
223 Analyzer (Agilent). iPSC-derived neurons were plated on XFp microplates (Agilent) at  
224 a density of 70,000 per well and grown in N2 medium for 48 hrs before the  
225 experiment. Measurement of neuronal oxidative consumption rate was performed in  
226 freshly prepared medium consisting of phenol-free DMEM, 1 mM Natrium Pyruvate,  
227 2mM Glutamine and 10mM glucose with pH adjusted to 7.4. Mitochondrial function  
228 was evaluated after subsequent injection of 10 $\mu$ M oligomycin, 10  $\mu$ M carbonyl  
229 cyanide p-trifluoromethoxyphenylhydrazone (CCCP) and 2 $\mu$ M Antimycin A / 1 $\mu$ M  
230 Rotenone (all Sigma-Aldrich). For each condition 3 measurements, lasting 5 minutes  
231 each, were performed: after each injection, OCR was measured for 2 minutes, the  
232 medium was mixed for 2 min, let rest for 1 min, and then respiration was measured  
233 again. After measurement, values were normalized to cell number by counting DAPI  
234 stained nuclei using a high-content cell analyzer (BD Bioscience, Pathway 855).

235

## 236 **Quantitative RT-PCR**

237 mRNA was isolated using an RNA isolation kit (Qiagen). Following the reverse  
238 transcription reaction using the QuantiTect Reverse Transcription kit, quantitative  
239 PCR reaction was performed using SYBR GREEN (all Qiagen) and monitored with a  
240 Vii7 Real time PCR system (Applied Biosystems). The expression level of each  
241 gene was normalized to the housekeeping gene ribosomal protein large P0 (Rplp0).  
242 Fold-changes in gene expression were calculated using the  $2^{-DDCT}$  method, based on  
243 biological reference samples and housekeeping genes for normalization.

244

### **qPCR primers (5'-3')**

|              |    |                       |
|--------------|----|-----------------------|
| <i>GAPDH</i> | Fw | AGGGGAGATTTCAGTCTGG   |
|              | Rv | CGACCACTTTGTCAAGCT    |
| <i>HSP60</i> | Fw | TGACCCAACAAAGTTGTGA   |
|              | Rv | CATACCACCTCCCATTCCAC  |
| <i>LONP1</i> | Fw | CCCGCGCTTTATCAAGATT   |
|              | Rv | AGAAAGACGCCGACATAAGG  |
| <i>ATF4</i>  | Fw | GTCCCTCCAACAACAGCAAG  |
|              | Rv | CTATACCCAACAGGGCATCC  |
| <i>DDIT3</i> | Fw | AGCCAAAATCAGAGCTGGAA  |
|              | Rv | TGGATCAGTCTGGAAAAGCA  |
| <i>ERO1A</i> | Fw | AGCGGCACAGAGGTGCT     |
|              | Rv | TGTAGTCTTGGGAAAAGCCTG |
| <i>RPLP0</i> | Fw | CCTCATATCCGGGGGAATGTG |
|              | Rv | GCAGCAGCTGGCACCTTATTG |
| <i>HSPA9</i> | Fw | GGAAGCTGCTGAAAAGGCTA  |
|              | Rv | CTTGGGTCCAGAAGAATCCA  |
| <i>CLPP</i>  | Fw | CTCTTCTGCAATCCGAGAG   |
|              | Rv | GGATGTACTGCATCGTGTCC  |

|               |    |                       |
|---------------|----|-----------------------|
| 16S (mtDNA)   | Fw | GCCTTC CCCCGTAAATGATA |
|               | Rv | TTATGCGATTAC CGGGCTCT |
| <i>PITRM1</i> | Fw | ATCTGTTCCCGAGCTGTTCC  |
|               | Rv | GAAAGGCTCTCTGCACGGAT  |

245

## 246 **Mitochondrial isolation**

247 The mitochondrial isolation was performed using Qproteome® Mitochondria Isolation  
248 Kit (Qiagen) according to manufacturer's protocol.

249

## 250 **Western blot**

251 Proteins were extracted using Tris-buffered Saline (TBS) with 0.5% NP40 protein  
252 extraction buffer containing protease and phosphatase inhibitors (Roche), on ice,  
253 following centrifugation at 14,000 rpm and 4°C for 15min. The protein concentration  
254 of the supernatant was determined by BCA (Pierce). In total, 15–30 µg of the  
255 protein lysate was loaded on polyacrylamide gel (density ranged from 7.5% to 15%,  
256 depending on respective protein molecular weight) and transferred on a PVDF  
257 membrane (Millipore). Blots were blocked with 5% milk powder or 5% BSA in TBS +  
258 0.1% Tween-20 (TBST) and incubated with primary antibodies in milk or BSA  
259 blocking solution overnight at 4°C. This step was followed by incubation with  
260 corresponding HRP-conjugated secondary antibodies (Sigma Aldrich) for 1 h at room  
261 temperature. Visualization of proteins was done by using Amersham ECL Western  
262 Blotting Detection Reagent and Amersham Hyperfilm (both GE Healthcare).  
263 Densitometric analysis of proteins was performed by ImageJ software. Primary  
264 antibodies included: rabbit anti-LC3B (1:500, Cell Signaling Technologies #2775);  
265 mouse anti-APP 6E10 (Aβeta 1-16) (1:1000, Biolegend #803004); rabbit anti-  
266 PITRM1 (1:1000; Atlas Antibodies #HPA006753); rabbit anti-Frataxin (1:1000,  
267 Abcam #ab175402); mouse anti-Total OXPHOS human cocktail (1:1000, Abcam  
268 #ab110411); mouse anti-ubiquitin (1:5000, Millipore #MAB1510); mouse anti-HSPA9  
269 (1:3000, Santa Cruz Biotechnologies #sc-133137); mouse anti-HSP60 (1:3000,  
270 Santa Cruz Biotechnologies #sc-271215); rabbit anti-LONP1 (1:3000, Proteintech  
271 #15440-1-AP); mouse anti-tau (1:1000, HT7, Thermofisher #MN1000); mouse anti  
272 phospho-tau PHF-6 (Thr231) (1:1000, Thermofisher #35-5200); mouse anti-β-Actin  
273 (1:20000, Sigma Aldrich #A5441); mouse anti-VDAC1 (1:1000, Santa Cruz  
274 Biotechnologies #sc-390996).

275

## 276 **Autophagy studies**

277 Where indicated, cells were treated with NH<sub>4</sub>Cl (20 mM) and leupeptin (200 µM)  
278 (EMD, Millipore) for 4 h. LC3-II and LC-I levels were quantified by densitometry and



279 normalized to  $\beta$ -actin. LC3 flux was quantified by dividing the levels of LC3-II after  
280 treatment with lysosomal inhibitor for 4h, by the levels of LC3-II without treatment.

281

### 282 **Immunofluorescence**

283 Cells were fixed in 4% paraformaldehyde (PFA) in PBS (w/v) for 10 min, rinsed with  
284 PBS and blocked by 10% normal goat or donkey serum (NGS/NDS) in PBST (PBS +  
285 0.1% TritonX-100) for 60 min. Cells were then incubated with primary antibodies in  
286 10% NGS/NDS in PBST over night at 4°C following 1h incubation at 24°C with  
287 appropriate Alexa488/568 coupled secondary antibodies (1:1000, Invitrogen). Cell  
288 nuclei were stained with DAPI and final images were acquired using Leica TCS SP8  
289 confocal microscope (Leica Microsystems) and analyzed using Fiji software. Primary  
290 antibodies included: rabbit anti-LC3B (1:500, Cell Signaling Technologies #2775);  
291 mouse anti-CTIP2 (1:500, Abcam ab18465), rabbit anti-TBR1 (1:500, Abcam  
292 ab31940), mouse anti- $\beta$ -III-tubulin (1:1000, Sigma-Aldrich T8328-25UL), and anti-  
293 Caspase 3 (1:500, Cell Signaling Technology 9664T). LC3 particle number in  $\beta$ -III-  
294 tubulin positive cells was quantified with the “analyse particles” plug-in in ImageJ  
295 (NIH). Caspase 3 was quantified with mean fluorescence intensity in Image J (NIH).  
296 Quantification was carried out on, at least, 50 cells per condition, from three  
297 independent experiments.

298

### 299 **LDH assay**

300 The LDH assay (Promega) was performed as per the manufacturer’s instructions.

301

### 302 **Amyloid-beta species measurement**

303 For amyloid-beta species measurement in iPSC-cortical neurons,  $10^6$  cells were  
304 plated into a one well of 12-well plate and cell supernatant was collected after 5 days,  
305 snap frozen and stored at -80 °C until analysis. Cell pellet was collected and lysed for  
306 protein concentration determination and used for value normalization. Conditioned  
307 medium from at least 3 technical replicates was collected in each experiment. For  
308 amyloid-beta species measurement in cerebral organoids, individual organoids were  
309 re-plated into low attachment 96-well plates on an orbital shaker. Supernatant was  
310 collected after 5 days, snap frozen in liquid nitrogen and stored at -80 °C until  
311 analysis. After collection of supernatant, individual organoids were lysed and protein  
312 concentration measured with BCA for value normalization. The concentrations of  
313 A $\beta$ 40 (A $\beta$ <sub>x-40</sub>) and A $\beta$ 42 (A $\beta$ <sub>x-42</sub>) in the samples were measured on a Sector  
314 Imager 6000 using an electrochemiluminescence-based immunoassay, V-PLEX Ab  
315 Peptide Panel 1 (6E10) Kits (Meso Scale Discovery, Gaithersburg, MD, USA)

316 according to manufacturer's instructions. All samples were thawed on ice and diluted  
317 1:2 in buffer (Diluent 35, Meso Scale Discovery) before incubation. Neural  
318 differentiation medium without B27/N2 supplements was used as negative control for  
319 each measurement. Human CSF samples were used as internal references on each  
320 plate. At least 8 organoids were used for each measurement. Every sample was  
321 tested in duplicate (and excluded if the coefficient of variance (CV) was above 20%).  
322 Data analysis was run with the MSD DISCOVERY WORKBENCH software version  
323 2.0.

324

### 325 **Elisa**

326 Individual cerebral organoids were homogenized in ice-cold RIPA buffer containing  
327 protease and phosphatase inhibitors (Roche), following centrifugation at 14.000 rpm  
328 and 4°C for 10min. The protein concentration of the supernatant was determined by  
329 BCA (Pierce). Total and phospho-tau levels were assessed, in equal protein amounts,  
330 using ELISA assays (both Invitrogen, KHB0041 and KHO0631, respectively)  
331 according to manufacturer's instructions.

332

### 333 **Statistical analysis**

334 The Statistical Package GraphPad Prism version 7 and 8.3 (GraphPad Software)  
335 was used to analyze the data. Statistical significance was evaluated using two-tailed  
336 Student's t-test. Data are expressed as mean + S.E.M. or S.D. as indicated.

337

## 338 **Results**

### 339 **Mitochondrial dysfunction in PITRM1 knockout iPSC-derived neurons**

340 In order to overcome the limitation of the embryonic lethality previously observed in  
341 PITRM1 knockout mice <sup>2</sup> and examine the mechanistic link between PITRM1  
342 deficiency and neurodegeneration in a model that more closely resembles human  
343 disease, we generated PITRM1 knockout (PITRM1<sup>-/-</sup>) human iPSCs using  
344 CRISPR/Cas9 endonuclease-mediated gene editing. Appropriate sgRNAs targeting  
345 exon 3 and exon 4 were designed to introduce a frameshift deletion resulting in the  
346 complete knockout of PITRM1 protein (Supplementary Fig. 1A). Several  
347 homozygous clones were generated, and two fully characterized clones were  
348 selected and used for further analysis (Supplementary Fig. 1B-D). To address the  
349 impact of PITRM1 on the function of human neurons, we differentiated PITRM1<sup>+/+</sup>  
350 and PITRM1<sup>-/-</sup> iPSCs into neuronal cultures that were enriched for cortical neurons  
351 and we assessed neuronal cultures at 35 and 65 days *in vitro*. Both PITRM1<sup>+/+</sup> and

352 PITRM1<sup>-/-</sup> iPSCs efficiently generated cortical neurons (Fig. 1A). Western blot  
353 analysis confirmed the complete absence of PITRM1 protein in PITRM1<sup>-/-</sup> iPSC-  
354 derived neurons (Fig. 1B). No overt cell death was observed in neuronal cultures, as  
355 assessed by LDH assay at 35 and 65 days *in vitro* (Supplementary Fig. 1E) and  
356 cleaved Caspase 3 staining (data not shown). PITRM1 deficiency leads to the  
357 accumulation of non-degraded MTS sequences that in turn impair the processing of  
358 presequence proteins by the peptidase MPP<sup>8</sup>. Since MPP is also involved in the  
359 maturation of the human frataxin precursor<sup>15</sup>, we examined frataxin maturation by  
360 immunoblotting. A decreased ratio of processed, mature to immature frataxin was  
361 detected in PITRM1<sup>-/-</sup> iPSC-derived neural precursor cells (NPCs) and neurons  
362 (Supplementary Fig. 1F, G), indicating the impaired function of MPP and defects of  
363 mitochondrial of mitochondrial presequence processing. Since MTS peptides can  
364 bind to the membrane and perturb the mitochondrial electrochemical gradient, we  
365 evaluated the effect of PITRM1 deficiency on mitochondrial membrane potential and  
366 respiratory oxidative activity. Mitochondrial membrane potential was significantly  
367 reduced in PITRM1<sup>-/-</sup> neurons compared to isogenic PITRM1<sup>+/+</sup> neurons (Fig. 1C).  
368 However, mitochondrial reactive oxygen species (mtROS) were not significantly  
369 altered in PITRM1<sup>-/-</sup> neurons (Fig. 1D). Similarly, no significant difference in the  
370 respiratory oxidative activity was observed between PITRM1<sup>+/+</sup> and PITRM1<sup>-/-</sup>  
371 neurons (Fig. 1E). Western blot analysis revealed a significant increase in the level of  
372 Complex II respiratory chain complex subunits in PITRM1<sup>-/-</sup> neurons (Fig. 1F, G).  
373 However, no significant difference for the levels of all other respiratory chain complex  
374 subunits was detected in PITRM1<sup>-/-</sup> neurons (Fig. 1F, G).

375

### 376 **PITRM1<sup>-/-</sup> iPSC-derived cortical neurons show induction of mitochondrial** 377 **stress response and enhanced mitophagy**

378 Mitochondrial stress response has been identified as a common signature in several  
379 neurodegenerative as well primary mitochondrial diseases<sup>16-19</sup>. Thus, we examined  
380 the expression levels of genes involved in mitochondrial unfolded protein response  
381 (UPR<sup>mt</sup>) and, more generally, in the mitochondrial integrated stress response  
382 pathway (mtISR). PITRM1<sup>-/-</sup> iPSC-derived cortical neurons exhibited a significant  
383 induction of UPR<sup>mt</sup>/mtISR transcripts (*ATF4*, *DDIT3*, *HSP60*, *HSPA9*, *ERO1*) (Fig.  
384 2A). Moreover, gene expression of the mitochondrial proteases, *LONP1* and *CLPP*,  
385 was significantly upregulated in PITRM1<sup>-/-</sup> neurons compared to controls (Fig. 2A). In  
386 line with gene expression data, we found an increase in protein expression of the  
387 chaperones HSPA9 and HSP60, and the mitochondrial protease LONP1 (Fig. 2B).  
388 These data indicate that the accumulation of MTS, due to PITRM1 deficiency, leads

389 to a strong upregulation of the ISR pathway. Since, the ISR has been shown to  
390 activate autophagy<sup>20, 21</sup>, we assessed the autophagosome content by  
391 immunostaining for endogenous light chain type 3 protein (LC3), a marker of  
392 autophagosomes. Our analysis revealed a significant decrease of LC3-positive  
393 vesicles in PITRM1<sup>-/-</sup> neurons compared to isogenic PITRM1<sup>+/+</sup> neurons (Fig. 2C, D).  
394 These results were confirmed by Western blot, showing decreased basal levels of  
395 LC3-II in PITRM1<sup>-/-</sup> neurons (Fig. 2E). However, inhibition of lysosomal degradation  
396 by leupeptin and ammonium chloride revealed that the autophagic flux was  
397 significantly increased in PITRM1<sup>-/-</sup> neurons, thus confirming autophagy activation  
398 (Fig. 2E, F). To assess whether the observed increase in autophagic flux leads to an  
399 enhanced turnover rate of mitochondria by autophagy, we purified mitochondria from  
400 PITRM1<sup>+/+</sup> and PITRM1<sup>-/-</sup> iPSC-derived cortical neurons. Immunoblotting of purified  
401 mitochondria showed increased ubiquitination of PITRM1<sup>-/-</sup> neurons compared to  
402 PITRM1<sup>+/+</sup> neurons (Fig. 2G, H), suggesting their targeting to lysosomes and  
403 increased mitochondrial clearance<sup>22</sup>. In line with these results, mitochondrial content  
404 was lower in PITRM1<sup>-/-</sup> neurons, as shown by a reduced mitochondrial to nuclear  
405 DNA ratio (Fig. 2I). Taken together, these results suggest that loss of PITRM1  
406 function enhances mitochondrial clearance.

407

#### 408 **PITRM1<sup>-/-</sup> iPSC-derived neurons show accumulation of APP and increase in** 409 **extracellular A $\beta$ peptides levels**

410 To examine the impact of PITRM1 activity on A $\beta$  pathology, we first assessed the  
411 levels of APP by Western blot. APP protein levels were found significantly increased  
412 in PITRM1<sup>-/-</sup> neurons compared to PITRM1<sup>+/+</sup> neurons (Fig. 3A). Next, supernatant  
413 from PITRM1<sup>+/+</sup> and PITRM1<sup>-/-</sup> cortical neurons was analyzed using the Meso Scale  
414 Discovery immunoassay for human A $\beta$  peptides. PITRM1<sup>-/-</sup> neurons showed  
415 significantly higher levels of A $\beta$ 40 and A $\beta$ 42 peptides as well as an increased  
416 A $\beta$ 42/A $\beta$ 40 ratio compared to control samples (Fig. 3B). Remarkably, A $\beta$  peptides  
417 were not detected in mitochondrial extracts from PITRM1 deficient neurons. Next, we  
418 explored the mechanisms that link loss of PITRM1 function with alteration of APP  
419 metabolism. Since UPR<sup>mt</sup> may have an impact on ubiquitin-dependent protein  
420 turnover<sup>23</sup>, we examined the levels of ubiquitinated proteins by Western blot. We  
421 observed that PITRM1<sup>-/-</sup> display increased levels of ubiquitinated proteins (Fig. 3C, D),  
422 suggesting defects in cellular proteostasis.

423

#### 424 **PITRM1<sup>-/-</sup> cerebral organoids exhibit main features of AD pathology and** 425 **induction of mitochondrial stress response**

426 Despite APP accumulation and increased A $\beta$ 42/A $\beta$ 40 ratio, 2D iPSC-derived  
427 neuronal cultures did not show A $\beta$  aggregates nor tau pathology or overt cell death.  
428 To further investigate the mechanisms of PITRM1 neurotoxicity in a model that better  
429 resembles the human disease, we developed cerebral organoids from PITRM1<sup>+/+</sup> and  
430 PITRM1<sup>-/-</sup> iPSCs and cultured them over a broad time range (1-6 months). Cerebral  
431 organoids derived from PITRM1<sup>+/+</sup> and PITRM1<sup>-/-</sup> iPSCs displayed similar sizes and  
432 cortical layering characteristics (Fig. 4A and Supplementary Fig. 2A). Next, we  
433 examined whether PITRM1<sup>-/-</sup> cerebral organoids develop AD-like neurodegenerative  
434 features. Western blotting revealed increased APP levels and tau  
435 hyperphosphorylation in 2-months old PITRM1<sup>-/-</sup> cerebral organoids (Fig. 4B-E).  
436 Furthermore, immunoassay measurements showed a higher A $\beta$ 40, A $\beta$ 42 and  
437 A $\beta$ 42/A $\beta$ 40 ratio in PITRM1<sup>-/-</sup> cerebral organoids compared to controls  
438 (Supplementary Fig. 2B). Similarly, immunofluorescence staining showed increased  
439 APP and phospho-tau levels in PITRM1<sup>-/-</sup> organoids compared to PITRM1<sup>-/-</sup> controls  
440 starting at 2 months (Fig. 4F, G, I). No further increase of APP levels or tau  
441 hyperphosphorylation were observed at later time points (Supplementary Figure 2C).  
442 Next, we stained 1-, 2-, and 6-month old PITRM1<sup>+/+</sup> and PITRM1<sup>-/-</sup> cerebral organoids,  
443 for cleaved caspase-3. The number of cleaved caspase-3 positive cells in the  
444 neuroepithelial layers was higher in PITRM1<sup>-/-</sup> cerebral organoids than controls,  
445 starting at 2 months (Fig. 4H, I and Supplementary Fig. 2D), suggesting a higher  
446 extent of cell death. No further increase of cell death was observed at later time  
447 points (Supplementary Figure 2D). To analyze ubiquitin-dependent protein turnover,  
448 an immunostaining against ubiquitinated proteins was performed. PITRM1<sup>-/-</sup>  
449 organoids display increased levels of ubiquitinated proteins (Fig 4J, K). Thioflavin T  
450 positive aggregates were detected in cerebral organoids generated from PITRM1<sup>-/-</sup>  
451 iPSCs, indicating that protein deposits are organized into amyloid-like aggregates,  
452 similar to the ones observed in AD plaques (Supplementary Fig. 2E). Next, we  
453 examined the expression levels of genes involved in UPR<sup>mt</sup> in 2-month old PITRM1<sup>+/+</sup>  
454 and PITRM1<sup>-/-</sup> cerebral organoids. PITRM1<sup>-/-</sup> cerebral organoids exhibited a  
455 significant induction of UPR<sup>mt</sup> transcripts (*ATF4*, *DDIT3*, *HSP60*, *HSPA9*, *ERO1*)  
456 (Fig.4L). Moreover, gene expression of the mitochondrial proteases, *LONP1* and  
457 *CLPP*, was significantly upregulated in PITRM1<sup>-/-</sup> cerebral organoids compared to  
458 controls (Fig.4L).

459

#### 460 **Inhibition of UPR<sup>mt</sup> exacerbates A $\beta$ proteotoxicity**

461 Given that UPR<sup>mt</sup> can extend lifespan in a variety of organisms <sup>24-27</sup>, we asked  
462 whether the induction of UPR<sup>mt</sup> observed in PITRM1<sup>-/-</sup> cerebral organoids could act as

463 a protective mechanism against defects of mitochondrial protein maturation and A $\beta$   
464 proteotoxicity. To this end, cerebral organoids were treated daily with ISRIB, a global  
465 ISR inhibitor<sup>28</sup>. First, we examined APP levels and phospho-tau/tau ratio by  
466 immunostaining. Consistent with a protective role of UPR<sup>mt</sup> in our model, ISRIB-  
467 treated cerebral organoids showed higher APP and phospho-tau levels compared to  
468 controls (Fig. 5A-C). Remarkably, the effect was similar in both PITRM1<sup>+/+</sup> and  
469 PITRM1<sup>-/-</sup> organoids (Fig. 5A-C). In parallel, ISRIB treatment significantly increased  
470 the A $\beta$ 42/A $\beta$ 40 ratio (Fig. 5D) in both PITRM1<sup>+/+</sup> and PITRM1<sup>-/-</sup> organoids.  
471 Interestingly, ISRIB-treated cerebral organoids also showed an increase of  
472 mitochondrial DNA, suggesting that inhibition of UPR<sup>mt</sup> leads to a decrease of  
473 mitochondrial clearance (Fig. 5E).

474

#### 475 **Enhancing mitophagy via NAD<sup>+</sup> precursors ameliorates A $\beta$ proteotoxicity**

476 Since defects in mitophagy have been shown to contribute to AD<sup>29</sup> and ISRIB-  
477 treated cerebral organoids showed decreased mitochondrial clearance and  
478 exacerbation of AD-like phenotypes, we investigated whether enhancing  
479 mitochondrial clearance ameliorates AD-like phenotype in PITRM1-related  
480 mitochondrial neurodegeneration. To this end, PITRM1<sup>+/+</sup> and PITRM1<sup>-/-</sup> cerebral  
481 organoids were treated with the NAD<sup>+</sup> precursor nicotinamide mononucleotide  
482 (NMN), which has been shown to ameliorate mitochondrial function and clearance<sup>30</sup>.  
483 While NMN supplementation resulted in increased mtDNA/nDNA ratio in PITRM1<sup>+/+</sup>  
484 organoids, a significant decrease of mitochondrial content was observed in PITRM1<sup>-/-</sup>  
485 organoids after treatment (Fig. 5F). These data suggest a differential role of NAD<sup>+</sup>  
486 boosters in the physiological and pathological conditions, namely induction of  
487 mitochondrial biogenesis in physiological condition and enhancement of  
488 mitochondrial clearance in the disease condition. Furthermore, NMN treatment  
489 significantly decreased the A $\beta$ 42/A $\beta$ 40 ratio and phospho-tau/tau levels in PITRM1<sup>-/-</sup>  
490 cerebral organoids as revealed by Meso Scale and Elisa measurements (Fig. 5G, H).

491

#### 492 **Discussion**

493 Since the brain is the organ with the highest demand for energy, it comes as no  
494 surprise that it also represents the major disease target, both in genetically driven  
495 primary mitochondrial diseases, as well as in common age-related  
496 neurodegenerative disorders. Despite this evidence, the causal link between  
497 mitochondrial demise and neurodegeneration still remains elusive. We have recently  
498 reported that pathogenic variants in the nuclear-encoded mitochondrial peptidase

499 PITRM1 result in childhood-onset recessive cerebellar disease leading to a slowly  
500 progressive syndrome, characterized by spinocerebellar ataxia, mild intellectual  
501 disability, psychiatric manifestations, and cognitive decline <sup>2,3</sup>. The clinical picture of  
502 these patients is unusual for mitochondrial disease, with a very slow progression of  
503 cognitive and psychiatric symptoms from childhood to their late sixties <sup>2</sup>.  
504 PITRM1<sup>+/-</sup> mice show a neurological phenotype with presence of A $\beta$  positive plaques  
505 in the neuropilum <sup>2</sup>. However, due to the embryonic lethality of complete PITRM1<sup>-/-2</sup>,  
506 the exact mechanisms of PITRM1 in brain function and disease could not be entirely  
507 studied. To address these questions, we have generated a novel human stem cell-  
508 based model of loss of PITRM1 function that recapitulates several pathological  
509 aspects of human PITRM1-related mitochondrial and adult onset neurodegenerative  
510 diseases. Employing iPSC-derived cortical neurons, we found that loss of PITRM1  
511 function leads to a strong induction of mitochondrial stress responses, enhanced  
512 autophagic flux and mitochondrial clearance, as well as increased levels of APP, A $\beta$   
513 peptides, and increased A $\beta$ 42/40 ratio. Several works have shown the uptake and  
514 accumulation of A $\beta$  within the mitochondria in post-mortem brains of AD patients as  
515 well as in later stages of disease in APP transgenic mice <sup>31,32</sup>. Furthermore, *in vitro*  
516 and yeast-based modeling has shown that loss of PITRM1 function results in the  
517 incomplete degradation of A $\beta$  in the mitochondria <sup>2, 8</sup>. Using sub-fractionation  
518 methods coupled with a highly sensitive immunoassay, we were unable to detect A $\beta$   
519 peptides in mitochondrial extracts from PITRM1 deficient cortical neurons. We  
520 cannot exclude the accumulation of low amount of A $\beta$  peptides within the  
521 mitochondria, below the detection limit of this study. However, PITRM1<sup>-/-</sup> neurons did  
522 not show an increase in mitochondrial ROS production or defects in oxidative  
523 phosphorylation, which have been shown to be a direct effect of the accumulation of  
524 A $\beta$  within mitochondria <sup>33,34</sup>. Our data suggests that MTS toxicity and mitochondrial  
525 proteostasis imbalance alone can be the first event of the pathogenetic cascade in  
526 PITRM1-related neurological syndrome. The mechanisms whereby PITRM1  
527 dysfunction causes APP accumulation may involve proteasome saturation, in  
528 response to mitochondrial protein misfolding. The ubiquitin proteasome system  
529 (UPS) is also involved in the quality control of mitochondrial proteins, especially the  
530 mitochondrial precursor proteins and proteins of the outer membrane <sup>35</sup>. Supporting  
531 an overload of the UPS system, we detected an accumulation of ubiquitinated  
532 proteins in PITRM1-deficient neurons and cerebral organoids. Based on these data,  
533 we propose that mitochondrial proteotoxic stress, possibly due to the accumulation of  
534 non-degraded MTS as a result of PITRM1 dysfunction and accumulation of

535 unprocessed mitochondrial proteins, triggers a cytosolic response with overload and  
536 saturation of the proteasome and defects in cytosolic protein degradation.

537

538 PITRM1 deficiency led to a strong induction of UPR<sup>mt</sup> in both 2D and brain organoids  
539 model systems. UPR<sup>mt</sup> is a transcriptional response involving mitochondrial  
540 chaperones and proteases activated by mitochondrial dysfunction and defects in  
541 mitochondrial protein folding<sup>36</sup>. The UPR<sup>mt</sup> is a key cellular quality control  
542 mechanism that promotes the maintenance of mitochondrial health and ensures  
543 proper cellular functions<sup>37</sup>. Despite the evidence of UPR<sup>mt</sup> activation in the ageing  
544 and disease brain<sup>16</sup>, whether and how UPR<sup>mt</sup> contributes to neurodegenerative  
545 processes is unclear. The UPR<sup>mt</sup> has been proposed to be a double edge sword,  
546 with its chronic activation leading to detrimental consequences for cellular and  
547 organismal function<sup>18, 38</sup>. A detrimental role of UPR<sup>mt</sup> has been demonstrated in  
548 animal models of mitochondrial diseases<sup>18, 38</sup>. However, mitochondrial stress  
549 responses have been documented in AD and recent work has shown that enhancing  
550 UPR<sup>mt</sup> provides protections against A $\beta$  proteotoxicity<sup>17, 39</sup>. In line with a beneficial role  
551 of UPR<sup>mt</sup>, PITRM1<sup>-/-</sup> cerebral organoids treated with ISRIB, an inhibitor of the ISR,  
552 showed a significant increase of APP levels, increased A $\beta$ 42/A $\beta$ 40 ratio, and tau  
553 hyperphosphorylation. Based on these data, we propose that PITRM1-related  
554 induction of UPR<sup>mt</sup> is a protective mechanism against proteotoxic stress both at the  
555 mitochondrial and cytosolic level. Importantly, our findings indicate that the  
556 consequences of chronic mtISR upregulation may vary substantially among different  
557 mitochondrial diseases and the underlying molecular defect should be carefully taken  
558 into consideration for therapeutic decisions.

559 Even though UPR<sup>mt</sup> was activated in both 2D and 3D PITRM1 KO models, only  
560 PITRM1 KO cerebral organoids displayed the typical abnormalities observed in the  
561 brain of AD patients, including neuronal cell death, tau pathology, and accumulation  
562 of protein aggregates, similar to A $\beta$  plaques. On the contrary, despite APP  
563 accumulation and increased A $\beta$ 42/A $\beta$ 40 ratio, we did not detect overt cell death, nor  
564 A $\beta$  aggregates or tau pathology in 2D iPSC-derived neuronal cultures. These  
565 findings indicate that 3D systems provide a more relevant, compared to 2D, disease  
566 model, advantageous in investigating the link between cellular proteostasis and  
567 disease. Due to the prolonged culturing conditions, as well as the presence and  
568 interaction among different cell types, including glial cells, 3D model systems may  
569 promote the development of disease relevant phenotypes, such as protein  
570 aggregation and neuronal death<sup>40</sup>. In respect to the mechanisms, these data also  
571 suggest that PITRM1 deficiency triggers compensatory quality control mechanisms



572 both at the cytosolic and mitochondrial level (i.e. induction of UPR<sup>mt</sup> and  
573 autophagy/mitophagy) that ensure the maintenance of cellular proteostasis. However,  
574 over time, these mechanisms may be not sufficient to protect neuronal cells against  
575 mitochondrial proteotoxicity, as observed in long-term culture cerebral organoids.

576

577 Several findings, including the induction of autophagic flux, decreased mtDNA levels,  
578 and increase of mitochondrial protein ubiquitination suggest that PITRM1 deficiency  
579 leads to increased mitochondrial clearance. It is known that defects in PITRM1  
580 activity lead to impaired MTS processing and accumulation of MTS and precursor  
581 proteins that have a toxic effect on mitochondria. In line with this evidence, we report  
582 that PITRM1<sup>-/-</sup> neurons show defects in the maturation of the human frataxin  
583 precursor and decreased mitochondrial membrane potential. Enhanced mitophagy  
584 could be triggered by mitochondrial depolarization in response to MTS accumulation  
585 within mitochondria. Furthermore, UPR<sup>mt</sup>, and in general the ISR, activates the  
586 autophagic pathway<sup>20, 21</sup>. Interestingly, inhibition of ISR, resulted in an increase in  
587 mtDNA suggesting that the activation of UPR<sup>mt</sup> is linked to the enhanced  
588 mitochondrial clearance in our model.

589

590 Interestingly, mitochondrial stress response and mitophagy transcripts have been  
591 found to be upregulated in mild cognitive impairment as well as in mild and moderate  
592 AD patients, whereas defective mitophagy may play a role in the disease progression  
593 at later stages<sup>29, 41</sup>. Fang et al have recently shown that the enhancement of  
594 mitophagy is able to rescue AD-related pathology in different AD model systems<sup>29</sup>.  
595 In line with this finding, we show that stimulating mitophagy with NMN, a NAD+  
596 booster, significantly improves mitochondrial clearance, with a reduction of  
597 Aβ<sub>42</sub>/Aβ<sub>40</sub> ratio and tau hyperphosphorylation. On the contrary, inhibition of UPR<sup>mt</sup>  
598 with ISRIB led to decreased mitochondrial clearance and aggravation of Aβ and tau  
599 pathology. Thus, our data suggest a protective role of mitophagy against  
600 mitochondrial proteotoxicity induced by PITRM1 deficiency. Interestingly, NMN-  
601 related induction of mitophagy was evident only in PITRM1<sup>-/-</sup> cerebral organoids,  
602 while induction of mitochondrial biogenesis was detected in PITRM1<sup>+/+</sup> organoids  
603 upon treatment.

604

605 In conclusion, we report a novel cellular model of human PITRM1 deficiency that  
606 recapitulates several fundamental pathological aspects of PITRM1-related  
607 mitochondrial disease. Using human iPSC-derived cortical neurons and cerebral  
608 organoids, we show that loss of PITRM1 function leads to pathological features

609 similar to the ones observed in AD, namely protein aggregation, tau  
610 hyperphosphorylation, and neuronal death. We report that PITRM1 deficiency  
611 induces impairment of mitochondrial proteostasis and activation of UPR<sup>mt</sup> that  
612 activates cytosolic quality control pathways, such as the UPS and autophagy. The  
613 overload of the UPS causes, on the long run, a reduced capacity of degrading  
614 cytosolic proteins leading to APP accumulation, increased level of A $\beta$  species,  
615 increased A $\beta$ 42/40 ratio, and extracellular protein aggregation. Furthermore, we  
616 show that, similar to what has been described in AD, enhancing UPR<sup>mt</sup> and  
617 mitophagy ameliorates neuropathological features in primary mitochondrial disease-  
618 related neurodegeneration. Importantly, although PITRM1 mutations are relatively  
619 rare, the disease mechanisms described in the present study may apply to both  
620 primary mitochondrial diseases and more common adult-onset neurological diseases.  
621 Thus, our data support a mechanistic link between primary mitochondrial disorders  
622 and common neurodegenerative proteinopathies.

623

#### 624 **Figure legend.**

#### 625 **Figure 1. Mitochondrial dysfunction in PITRM1<sup>-/-</sup> iPSC-derived cortical neurons.**

626 Control PITRM1<sup>+/+</sup> (WT) and isogenic PITRM1<sup>-/-</sup> (KO) iPSCs were differentiated into  
627 cortical neurons. **(A)** Immunostaining of indicated differentiated iPSC cultures at day  
628 *in vitro* 35. Cells were stained for TBR1 (green) and  $\beta$ -III Tubulin ( $\beta$ -TUBIII, red).  
629 Nuclei were counterstained with DAPI (blue). Scale bars, 50  $\mu$ m. **(B)** Representative  
630 western blot for PITRM1, showing absence of PITRM1 in human PITRM1<sup>-/-</sup> iPSC-  
631 derived cortical neurons. **(C)** Mitochondrial membrane potential in isogenic  
632 PITRM1<sup>+/+</sup> and PITRM1<sup>-/-</sup> iPSC-derived neurons, as determined by a  
633 tetramethylrhodamine methyl ester (TMRM) assay and flow cytometry analysis. Data  
634 are expressed as percentage of TMRM positive cells (mean + SEM; \* p<0.05, two-  
635 tailed t test, n=4). **(D)** Mitochondrial reactive oxidative species level as analyzed by  
636 MitoSOX labeling in isogenic PITRM1<sup>+/+</sup> and PITRM1<sup>-/-</sup> iPSC-derived neurons (mean  
637 + SEM, n=5). **(E)** Oxygen consumption rate (OCR) of PITRM1<sup>+/+</sup> and PITRM1<sup>-/-</sup> iPSC-  
638 derived neurons. Data are normalized to protein content (mean  $\pm$  SD, n=6). **(F, G)**  
639 Western blot analysis of OXPHOS complex protein levels in PITRM1<sup>+/+</sup> and PITRM1<sup>-/-</sup>  
640 iPSC-derived neurons. Representative blot is shown in (F) and the quantification is  
641 shown in (G) (mean + SEM; \* p<0.05, two-tailed t test, n=4).

642

643 **Figure 2. PITRM1<sup>-/-</sup> iPSC-derived neurons show induction of UPR<sup>mt</sup> and**  
644 **enhanced mitophagy. (A)** Gene expression levels of mitochondrial stress response

645 genes in PITRM1<sup>+/+</sup> and PITRM1<sup>-/-</sup> iPSC-derived cortical neurons (mean + SEM; \*\*  
646 p<0.01, \* p<0.05, two-tailed t test, n=5). **(B)** Representative Western blots of the  
647 mitochondrial chaperones HSPA9, HSP60 and the mitochondrial protease LONP1 in  
648 PITRM1<sup>+/+</sup> and PITRM1<sup>-/-</sup> iPSC-derived cortical neurons. **(C)** Immunostaining of  
649 PITRM1<sup>+/+</sup> and PITRM1<sup>-/-</sup> iPSC-derived cortical neurons for LC3 (green) and  $\beta$ -TUBIII  
650 (red). Nuclei were counterstained with DAPI (blue). Scale bars, 10  $\mu$ m. **(D)** Number  
651 of LC3-positive vesicles per  $\beta$ -TUBIII positive cell relative to control neurons (mean +  
652 SEM; \*\*\* p<0.001, two-tailed t test, n=3). **(E)** Western blot analysis for LC3 in  
653 PITRM1<sup>+/+</sup> and PITRM1<sup>-/-</sup> iPSC-derived neuronal cultures, untreated (-) or treated  
654 with 200  $\mu$ M leupeptin and 20 mM NH<sub>4</sub>Cl for 4 h (+). **(F)** Quantification of LC3 flux  
655 normalized to WT (mean + SEM; \* p<0.05, two-tailed t test, n=4). **(G)** Representative  
656 Western blot of isolated mitochondria from PITRM1<sup>+/+</sup> and PITRM1<sup>-/-</sup> iPSC-derived  
657 neurons with an antibody for ubiquitination and VDAC as loading control. **(H)**  
658 Quantification of mitochondrial protein ubiquitination levels in PITRM1<sup>+/+</sup> and  
659 PITRM1<sup>-/-</sup> iPSC-derived neurons (mean + SEM; \*\* p<0.01, two-tailed t test, n=3). **(I)**  
660 mtDNA content was measured as mitochondrial (16S) to nuclear (*RPLP0*) DNA ratio  
661 by qRT-PCR (mean + SEM; \* p<0.05, two-tailed t test, n=3).

662

663 **Figure 3. PITRM1<sup>-/-</sup> iPSC-derived neurons show accumulation of APP and**  
664 **increased levels of A $\beta$  peptides. (A)** Representative Western blots of APP in  
665 PITRM1<sup>+/+</sup> and PITRM1<sup>-/-</sup> iPSC-derived cortical neurons. Quantification of APP levels  
666 normalized to loading control (mean + SEM; \* p<0.05, two-tailed t test, n=5). **(B)**  
667 Quantification of A $\beta$  species and A $\beta$ 42/A $\beta$ 40 ratio in the supernatant of PITRM1<sup>+/+</sup>  
668 and PITRM1<sup>-/-</sup> iPSC-derived cortical neurons at day in vitro 35, as performed by  
669 Meso Scale immunoassay (mean + SEM; \*\* p<0.01, \*\*\* p<0.001, two-tailed t test,  
670 n=4). **(C)** Representative Western blot of PITRM1<sup>+/+</sup> and PITRM1<sup>-/-</sup> iPSC-derived  
671 neurons of total ubiquitinated proteins levels. **(D)** Quantification of protein  
672 ubiquitination level in PITRM1<sup>+/+</sup> and PITRM1<sup>-/-</sup> iPSC-derived neurons (mean + SEM;  
673 \* p<0.05, two-tailed t test, n=4).

674

675 **Figure 4. PITRM1<sup>-/-</sup> cerebral organoids display main pathological features of AD**  
676 **pathology and induction of mitochondrial stress response. (A)** Generation and  
677 characterization of cerebral organoids from PITRM1<sup>+/+</sup> and PITRM1<sup>-/-</sup> iPSCs.  
678 Immunostaining for  $\beta$ -TUBIII (green), TBR1 (red), and CTIP2 (red) of 2-month old  
679 cerebral organoids. Cell nuclei were counterstained with DAPI (blue). Scale bar,  
680 100 $\mu$ m. **(B)** Western blot of APP in 2-month old PITRM1<sup>+/+</sup> and PITRM1<sup>-/-</sup> cerebral  
681 organoids. **(C)** Quantification of APP protein levels in cerebral organoids (mean +

682 SEM; \*  $p < 0.05$ , two-tailed t test,  $n=5$ ). **(D)** Representative Western blot of phospho-  
683 tau (p-tau) and total tau in PITRM1<sup>+/+</sup> and PITRM1<sup>-/-</sup> cerebral organoids; total tau and  
684  $\beta$ -Actin were used as loading controls. **(E)** Quantification of phospho-tau protein  
685 levels in cerebral organoids relative to loading control total tau/ $\beta$ -Actin (mean + SEM;  
686 \*  $p < 0.05$ , two-tailed t test,  $n=5$ ). **(F, G)** MAP2 (green), APP (red, left panel), and  
687 phospho-tau (red, right panel) immunostaining in cerebral organoids. Representative  
688 confocal images are shown. Cell nuclei were counterstained with DAPI (blue). Scale  
689 bars, 100  $\mu$ m. **(H)** Immunostaining for  $\beta$ -TUBIII (green) and cleaved Caspase 3  
690 (cCASP3, red) in PITRM1<sup>+/+</sup> and PITRM1<sup>-/-</sup> 2-month old cerebral organoids. Cell  
691 nuclei were counterstained with DAPI (blue). Scale bar, 100 $\mu$ m. **(I)** Quantification of  
692 APP, phospho-tau fluorescent intensity and analysis of the ratio of cCASP3 positive  
693 cells relative to the total number cells, measured by DAPI staining, in 2-month old  
694 cerebral organoids (mean + SEM; \*  $p < 0.05$ , \*\*\*  $p < 0.001$ , two-tailed t test,  $n=3-4$ ). **(J)**  
695 MAP2 (green) and Ubiquitin (red) immunostaining in cerebral organoids.  
696 Representative confocal images are shown. Cell nuclei were counterstained with  
697 DAPI (blue). Scale bars, 100  $\mu$ m. **(K)** Quantification of Ubiquitin fluorescent intensity  
698 (mean + SEM; \*\*\*  $p < 0.001$ , two-tailed t test,  $n=3$ ). **(L)** Gene expression levels of  
699 mitochondrial stress response genes in PITRM1<sup>+/+</sup> and PITRM1<sup>-/-</sup> cerebral organoids  
700 (mean + SEM; \*  $p < 0.05$ , \*\*  $p < 0.01$ , two-tailed t test,  $n=5$ ).

701

702 **Figure 5. UPR<sup>mt</sup> and mitophagy exert a protective role in PTRM1<sup>-/-</sup> cerebral**  
703 **organoids.** PITRM1<sup>+/+</sup> and PITRM1<sup>-/-</sup> cerebral organoids were treated with 500 nM  
704 ISRIB or vehicle. **(A, B)** MAP2 (green), APP (red, in A), and phospho-tau (red, in B)  
705 immunostaining in PITRM1<sup>+/+</sup> and PITRM1<sup>-/-</sup> cerebral organoids treated with ISRIB or  
706 vehicle. Representative confocal images are shown. Cell nuclei were counterstained  
707 with DAPI (blue). Scale bars, 100  $\mu$ m. **(C)** Quantification of APP and phospho-tau  
708 fluorescent intensity (mean + SEM; \*\*\*  $p < 0.001$ , \*\*  $p < 0.01$ , \*  $p < 0.05$ , two-tailed t test,  
709  $n=3-4$ ). **(D)** Quantification of A $\beta$  species in supernatant of PITRM1<sup>+/+</sup> and PITRM1<sup>-/-</sup>  
710 cerebral organoids treated with ISRIB or vehicle, as measured by Meso Scale  
711 immunoassay (mean + SD; \*\*  $p < 0.01$ , \*  $p < 0.05$ , two-tailed t test,  $n=5$ ). **(E)** mtDNA  
712 content was measured in PITRM1<sup>+/+</sup> and PITRM1<sup>-/-</sup> cerebral organoids treated with  
713 ISRIB or vehicle as mitochondrial (*16S*) to nuclear (*RPLP0*) DNA ratio by qRT-PCR  
714 (mean + SD; \*  $p < 0.05$ , two-tailed t test,  $n=3$ ). **(F-H)** PITRM1<sup>+/+</sup> and PITRM1<sup>-/-</sup> cerebral  
715 organoids were treated with 500  $\mu$ M NMN or vehicle. (F) mtDNA content was  
716 measured as mitochondrial (*16S*) to nuclear (*RPLP0*) DNA ratio by qRT-PCR (mean  
717 + SEM; \*\*\*  $p < 0.001$ , \*  $p < 0.05$  two-tailed t test,  $n=3$ ). (G) A $\beta$ 1-42/A $\beta$ 1-40 ratio in

718 cerebral organoids measured by Meso Scale immunoassay (mean + SEM; \* p<0.05,  
719 two-tailed t test, n=3). (H) ELISA assay measuring the levels of total and phospho-  
720 tau levels in cerebral organoid homogenates. Protein concentration was measured  
721 by BCA and equal amounts of total protein were used (mean + SEM; \* p<0.05, \*\*\*  
722 p<0.001, two-tailed t test, n=3).

723

## 724 **Acknowledgements**

725 We acknowledge the funding support of CoEN Pathfinder II (Ref. 3038, to M.D.,  
726 M.Z.), the Helmholtz Association (to M.D.), DAAD (PKZ 91723383, to M.J.P.), and  
727 Fondazione Umberto Veronesi 2018-2019 (to D.B.) for this project.

728

## 729 **Author contributions**

730 M.D., D.I. and M.J.P. conceived the study. M.D., D.I., M.J.P., V.P., D.B., S.A.K., M.J.,  
731 M.Z., C.V. contributed to experimental design. D.I. performed gene editing. M.J.P.,  
732 V.P., G.D.N. performed the most of the experiments with iPSCs and cerebral  
733 organoids., R.S performed Meso Scale assay, M.D., D.I., M.J.P., V.P. analysed data.  
734 M.D. wrote the manuscript with input and approval from all the authors.

735

## 736 **Conflict of interest**

737

738 The authors declare no competing interests

739

## 740 **References**

- 741 1. Johri A, Beal MF. Mitochondrial dysfunction in neurodegenerative diseases. *J*  
742 *Pharmacol Exp Ther* 2012; **342**(3): 619-630.  
743
- 744 2. Brunetti D, Torsvik J, Dallabona C, Teixeira P, Sztromwasser P, Fernandez-Vizarra E  
745 *et al.* Defective PITRM1 mitochondrial peptidase is associated with Abeta amyloidotic  
746 neurodegeneration. *EMBO Mol Med* 2016; **8**(3): 176-190.  
747
- 748 3. Langer Y, Aran A, Gulsuner S, Abu Libdeh B, Renbaum P, Brunetti D *et al.*  
749 Mitochondrial PITRM1 peptidase loss-of-function in childhood cerebellar atrophy. *J Med*  
750 *Genet* 2018; **55**(9): 599-606.  
751
- 752 4. Town L, McGlenn E, Fiorenza S, Metzis V, Butterfield NC, Richman JM *et al.* The  
753 metalloendopeptidase gene Pitrm1 is regulated by hedgehog signaling in the developing  
754 mouse limb and is expressed in muscle progenitors. *Dev Dyn* 2009; **238**(12): 3175-3184.  
755
- 756 5. Stahl A, Nilsson S, Lundberg P, Bhushan S, Biverstahl H, Moberg P *et al.* Two novel  
757 targeting peptide degrading proteases, PrePs, in mitochondria and chloroplasts, so similar  
758 and still different. *J Mol Biol* 2005; **349**(4): 847-860.  
759
- 760 6. van 't Hof R, Demel RA, Keegstra K, de Kruijff B. Lipid-peptide interactions between  
761 fragments of the transit peptide of ribulose-1,5-bisphosphate carboxylase/oxygenase and  
762 chloroplast membrane lipids. *FEBS Lett* 1991; **291**(2): 350-354.  
763

- 764 7. Zardeneta G, Horowitz PM. Analysis of the perturbation of phospholipid model  
765 membranes by rhodanese and its presequence. *The Journal of biological chemistry* 1992;  
766 **267**(34): 24193-24198.  
767
- 768 8. Mossmann D, Vogtle FN, Taskin AA, Teixeira PF, Ring J, Burkhart JM *et al.* Amyloid-  
769 beta peptide induces mitochondrial dysfunction by inhibition of preprotein maturation. *Cell*  
770 *Metab* 2014; **20**(4): 662-669.  
771
- 772 9. Falkevall A, Alikhani N, Bhushan S, Pavlov PF, Busch K, Johnson KA *et al.*  
773 Degradation of the amyloid beta-protein by the novel mitochondrial peptidosome, PreP. *The*  
774 *Journal of biological chemistry* 2006; **281**(39): 29096-29104.  
775
- 776 10. Teixeira PF, Pinho CM, Branca RM, Lehtio J, Levine RL, Glaser E. In vitro oxidative  
777 inactivation of human presequence protease (hPreP). *Free Radic Biol Med* 2012; **53**(11):  
778 2188-2195.  
779
- 780 11. Pinho CM, Teixeira PF, Glaser E. Mitochondrial import and degradation of amyloid-  
781 beta peptide. *Biochimica et biophysica acta* 2014; **1837**(7): 1069-1074.  
782
- 783 12. Reinhardt P, Schmid B, Burbulla LF, Schondorf DC, Wagner L, Glatza M *et al.*  
784 Genetic correction of a LRRK2 mutation in human iPSCs links parkinsonian  
785 neurodegeneration to ERK-dependent changes in gene expression. *Cell stem cell* 2013;  
786 **12**(3): 354-367.  
787
- 788 13. Brennand KJ, Simone A, Jou J, Gelboin-Burkhart C, Tran N, Sangar S *et al.*  
789 Modelling schizophrenia using human induced pluripotent stem cells. *Nature* 2011;  
790 **473**(7346): 221-225.  
791
- 792 14. Lancaster MA, Renner M, Martin CA, Wenzel D, Bicknell LS, Hurles ME *et al.*  
793 Cerebral organoids model human brain development and microcephaly. *Nature* 2013;  
794 **501**(7467): 373-379.  
795
- 796 15. Branda SS, Cavadini P, Adamec J, Kalousek F, Taroni F, Isaya G. Yeast and human  
797 frataxin are processed to mature form in two sequential steps by the mitochondrial processing  
798 peptidase. *The Journal of biological chemistry* 1999; **274**(32): 22763-22769.  
799
- 800 16. Pellegrino MW, Haynes CM. Mitophagy and the mitochondrial unfolded protein  
801 response in neurodegeneration and bacterial infection. *BMC Biol* 2015; **13**: 22.  
802
- 803 17. Sorrentino V, Romani M, Mouchiroud L, Beck JS, Zhang H, D'Amico D *et al.*  
804 Enhancing mitochondrial proteostasis reduces amyloid-beta proteotoxicity. *Nature* 2017;  
805 **552**(7684): 187-193.  
806
- 807 18. Anderson CJ, Bredvik K, Burstein SR, Davis C, Meadows SM, Dash J *et al.* ALS/FTD  
808 mutant CHCHD10 mice reveal a tissue-specific toxic gain-of-function and mitochondrial stress  
809 response. *Acta neuropathologica* 2019; **138**(1): 103-121.  
810
- 811 19. Forsstrom S, Jackson CB, Carroll CJ, Kuronen M, Pirinen E, Pradhan S *et al.*  
812 Fibroblast Growth Factor 21 Drives Dynamics of Local and Systemic Stress Responses in  
813 Mitochondrial Myopathy with mtDNA Deletions. *Cell Metab* 2019.  
814
- 815 20. B'Chir W, Maurin AC, Carraro V, Averous J, Jousse C, Muranishi Y *et al.* The  
816 eIF2alpha/ATF4 pathway is essential for stress-induced autophagy gene expression. *Nucleic*  
817 *Acids Res* 2013; **41**(16): 7683-7699.  
818
- 819 21. Rzymiski T, Milani M, Pike L, Buffa F, Mellor HR, Winchester L *et al.* Regulation of  
820 autophagy by ATF4 in response to severe hypoxia. *Oncogene* 2010; **29**(31): 4424-4435.  
821
- 822 22. Grumati P, Dikic I. Ubiquitin signaling and autophagy. *The Journal of biological*  
823 *chemistry* 2018; **293**(15): 5404-5413.

- 824 23. Segref A, Kevei E, Pokrzywa W, Schmeisser K, Mansfeld J, Livnat-Levanon N *et al.*  
825 Pathogenesis of human mitochondrial diseases is modulated by reduced activity of the  
826 ubiquitin/proteasome system. *Cell Metab* 2014; **19**(4): 642-652.  
827
- 828 24. Durieux J, Wolff S, Dillin A. The cell-non-autonomous nature of electron transport  
829 chain-mediated longevity. *Cell* 2011; **144**(1): 79-91.  
830
- 831 25. Houtkooper RH, Mouchiroud L, Ryu D, Moullan N, Katsyuba E, Knott G *et al.*  
832 Mitonuclear protein imbalance as a conserved longevity mechanism. *Nature* 2013;  
833 **497**(7450): 451-457.  
834
- 835 26. Merkwirth C, Jovaisaite V, Durieux J, Matilainen O, Jordan SD, Quiros PM *et al.* Two  
836 Conserved Histone Demethylases Regulate Mitochondrial Stress-Induced Longevity. *Cell*  
837 2016; **165**(5): 1209-1223.  
838
- 839 27. Borch Jensen M, Qi Y, Riley R, Rabkina L, Jasper H. PGAM5 promotes lasting FoxO  
840 activation after developmental mitochondrial stress and extends lifespan in *Drosophila*. *eLife*  
841 2017; **6**.  
842
- 843 28. Sidrauski C, McGeachy AM, Ingolia NT, Walter P. The small molecule ISRIB  
844 reverses the effects of eIF2alpha phosphorylation on translation and stress granule assembly.  
845 *eLife* 2015; **4**.  
846
- 847 29. Fang EF, Hou Y, Palikaras K, Adriaanse BA, Kerr JS, Yang B *et al.* Mitophagy  
848 inhibits amyloid-beta and tau pathology and reverses cognitive deficits in models of  
849 Alzheimer's disease. *Nature neuroscience* 2019; **22**(3): 401-412.  
850
- 851 30. Fang EF, Kassahun H, Croteau DL, Scheibye-Knudsen M, Marosi K, Lu H *et al.*  
852 NAD(+) Replenishment Improves Lifespan and Healthspan in Ataxia Telangiectasia Models  
853 via Mitophagy and DNA Repair. *Cell Metab* 2016; **24**(4): 566-581.  
854
- 855 31. Hansson Petersen CA, Alikhani N, Behbahani H, Wiehager B, Pavlov PF, Alafuzoff I  
856 *et al.* The amyloid beta-peptide is imported into mitochondria via the TOM import machinery  
857 and localized to mitochondrial cristae. *Proceedings of the National Academy of Sciences of*  
858 *the United States of America* 2008; **105**(35): 13145-13150.  
859
- 860 32. Manczak M, Anekonda TS, Henson E, Park BS, Quinn J, Reddy PH. Mitochondria  
861 are a direct site of A beta accumulation in Alzheimer's disease neurons: implications for free  
862 radical generation and oxidative damage in disease progression. *Human molecular genetics*  
863 2006; **15**(9): 1437-1449.  
864
- 865 33. Casley CS, Canevari L, Land JM, Clark JB, Sharpe MA. Beta-amyloid inhibits  
866 integrated mitochondrial respiration and key enzyme activities. *Journal of neurochemistry*  
867 2002; **80**(1): 91-100.  
868
- 869 34. Aleari AM, Benard G, Augereau O, Malgat M, Talbot JC, Mazat JP *et al.* Gradual  
870 alteration of mitochondrial structure and function by beta-amyloids: importance of membrane  
871 viscosity changes, energy deprivation, reactive oxygen species production, and cytochrome c  
872 release. *J Bioenerg Biomembr* 2005; **37**(4): 207-225.  
873
- 874 35. Livnat-Levanon N, Glickman MH. Ubiquitin-proteasome system and mitochondria -  
875 reciprocity. *Biochimica et biophysica acta* 2011; **1809**(2): 80-87.  
876
- 877 36. Nargund AM, Pellegrino MW, Fiorese CJ, Baker BM, Haynes CM. Mitochondrial  
878 import efficiency of ATFS-1 regulates mitochondrial UPR activation. *Science* 2012;  
879 **337**(6094): 587-590.  
880
- 881 37. Shpilka T, Haynes CM. The mitochondrial UPR: mechanisms, physiological functions  
882 and implications in ageing. *Nat Rev Mol Cell Biol* 2018; **19**(2): 109-120.  
883

- 884 38. Khan NA, Nikkanen J, Yatsuga S, Jackson C, Wang L, Pradhan S *et al.* mTORC1  
885 Regulates Mitochondrial Integrated Stress Response and Mitochondrial Myopathy  
886 Progression. *Cell Metab* 2017; **26**(2): 419-428 e415.  
887
- 888 39. Beck JS, Mufson EJ, Counts SE. Evidence for Mitochondrial UPR Gene Activation in  
889 Familial and Sporadic Alzheimer's Disease. *Curr Alzheimer Res* 2016; **13**(6): 610-614.  
890
- 891 40. Gerakis Y, Hetz C. Brain organoids: a next step for humanized Alzheimer's disease  
892 models? *Mol Psychiatry* 2019; **24**(4): 474-478.  
893
- 894 41. Kerr JS, Adriaanse BA, Greig NH, Mattson MP, Cader MZ, Bohr VA *et al.* Mitophagy  
895 and Alzheimer's Disease: Cellular and Molecular Mechanisms. *Trends in neurosciences*  
896 2017; **40**(3): 151-166.  
897  
898



**A**

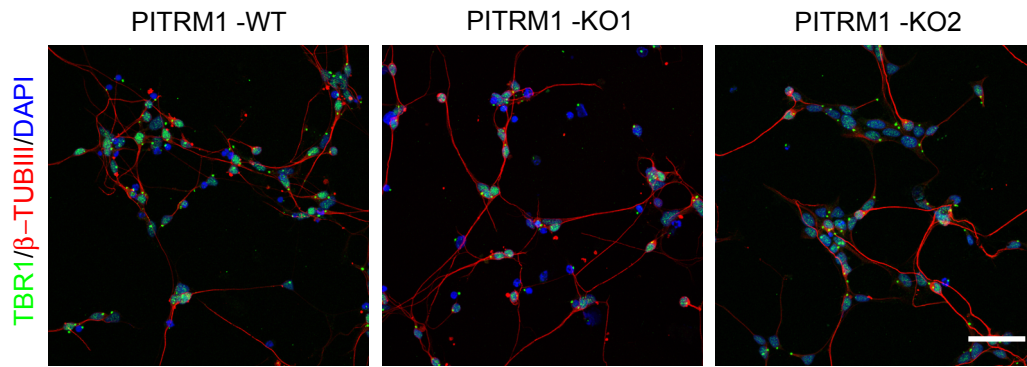

**B**

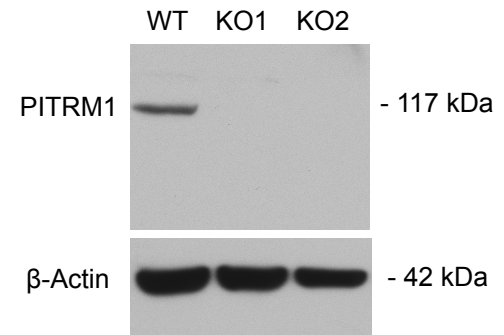

**C**

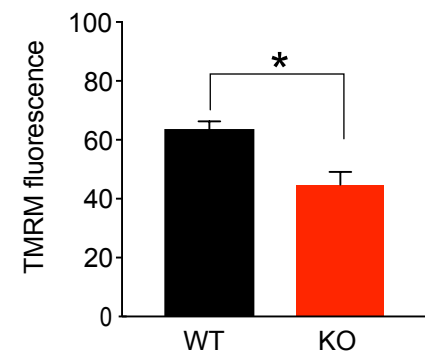

**D**

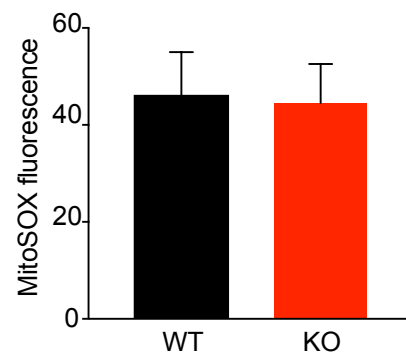

**E**

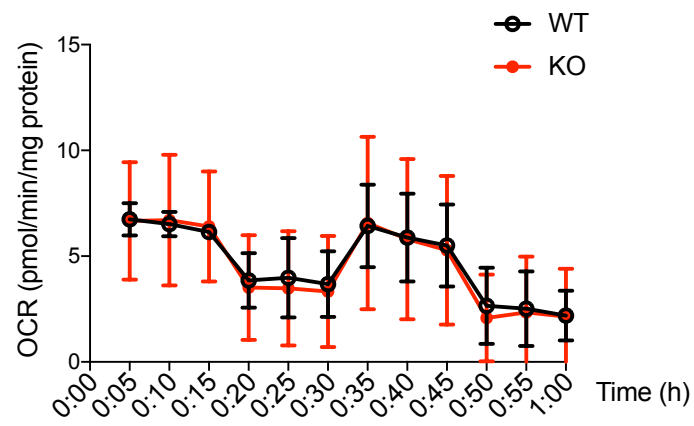

**F**

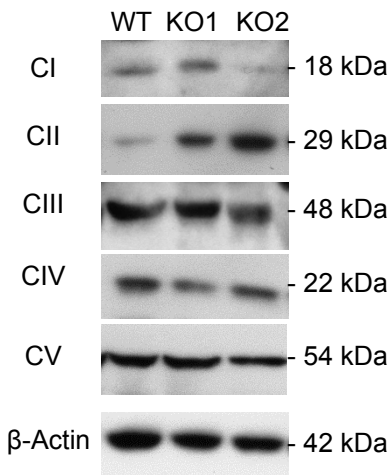

**G**

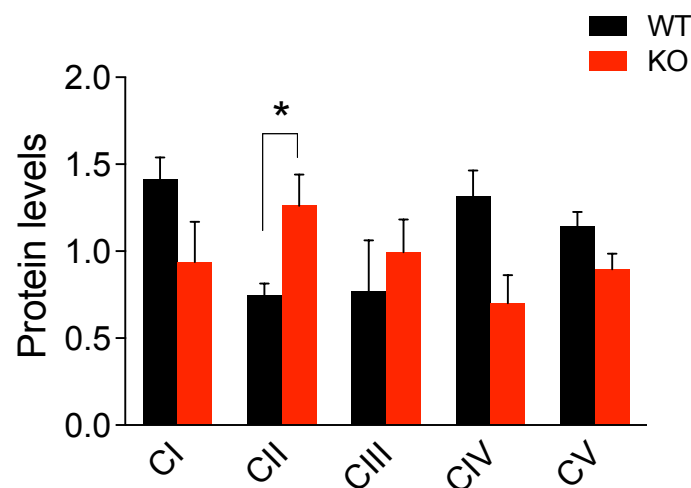

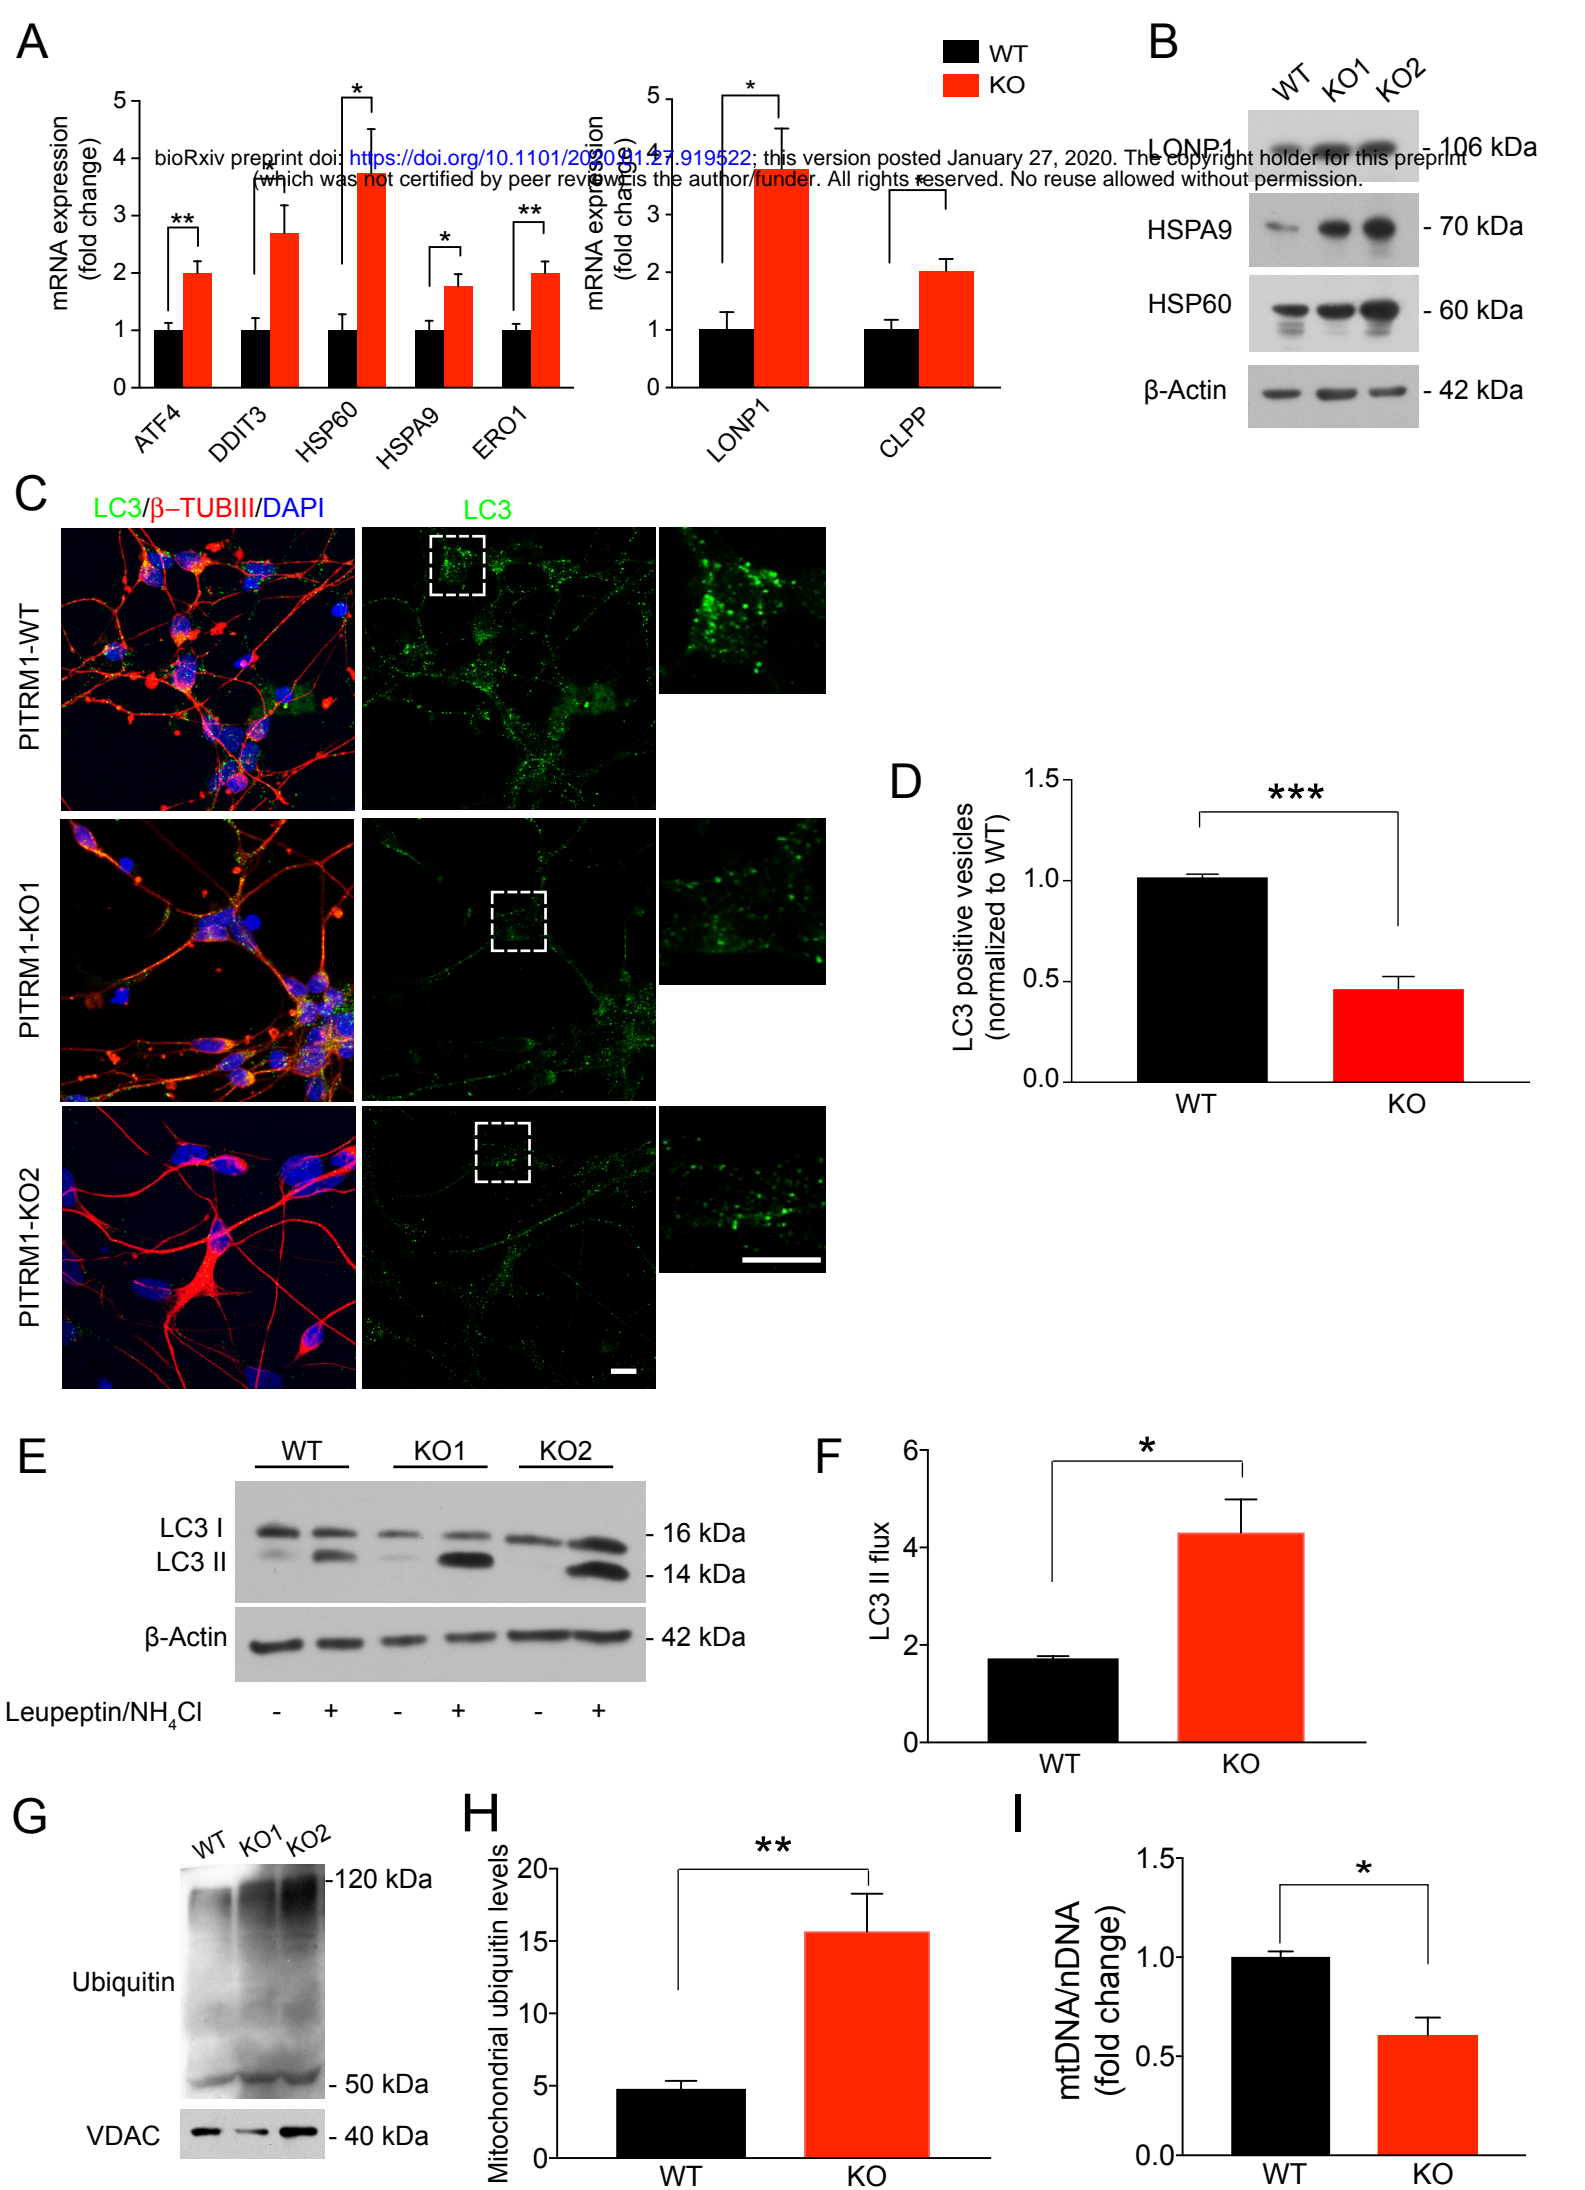

Figure 2

A

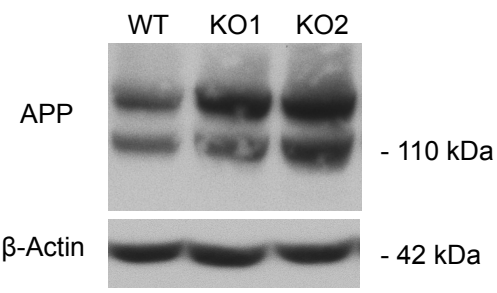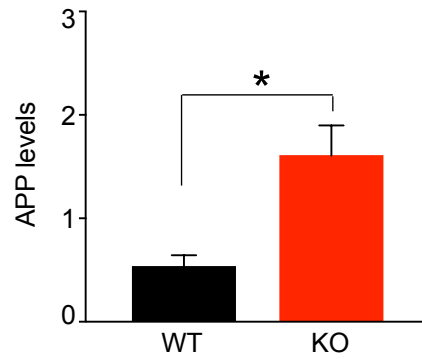

B

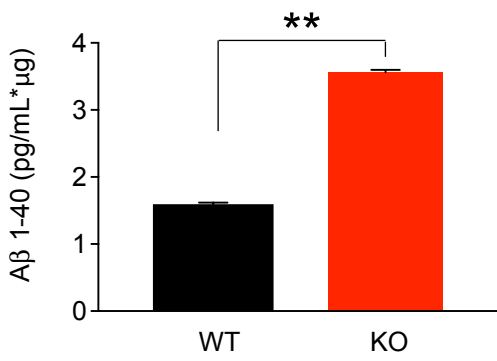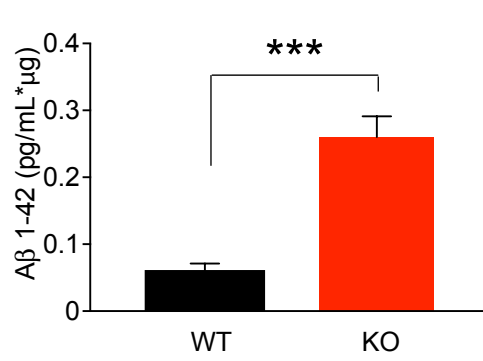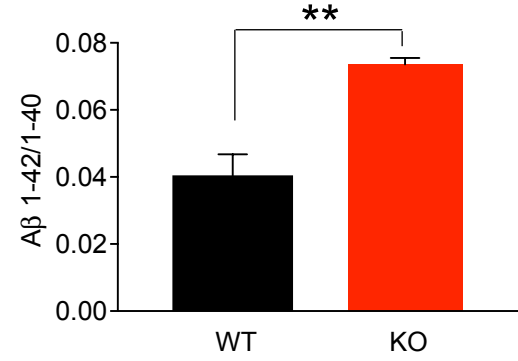

C

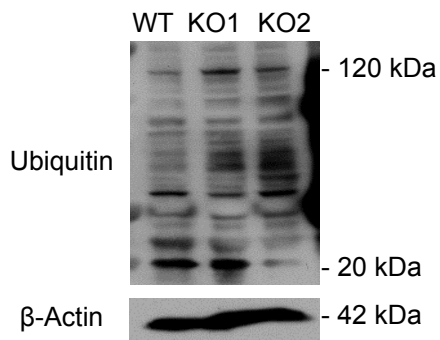

D

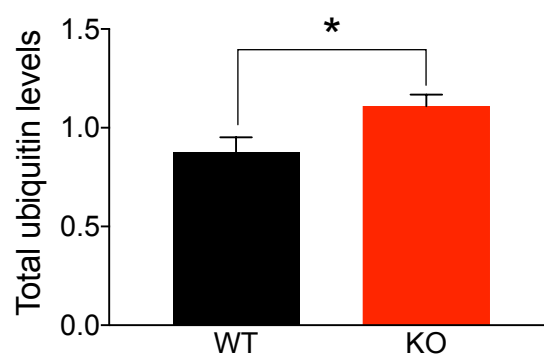

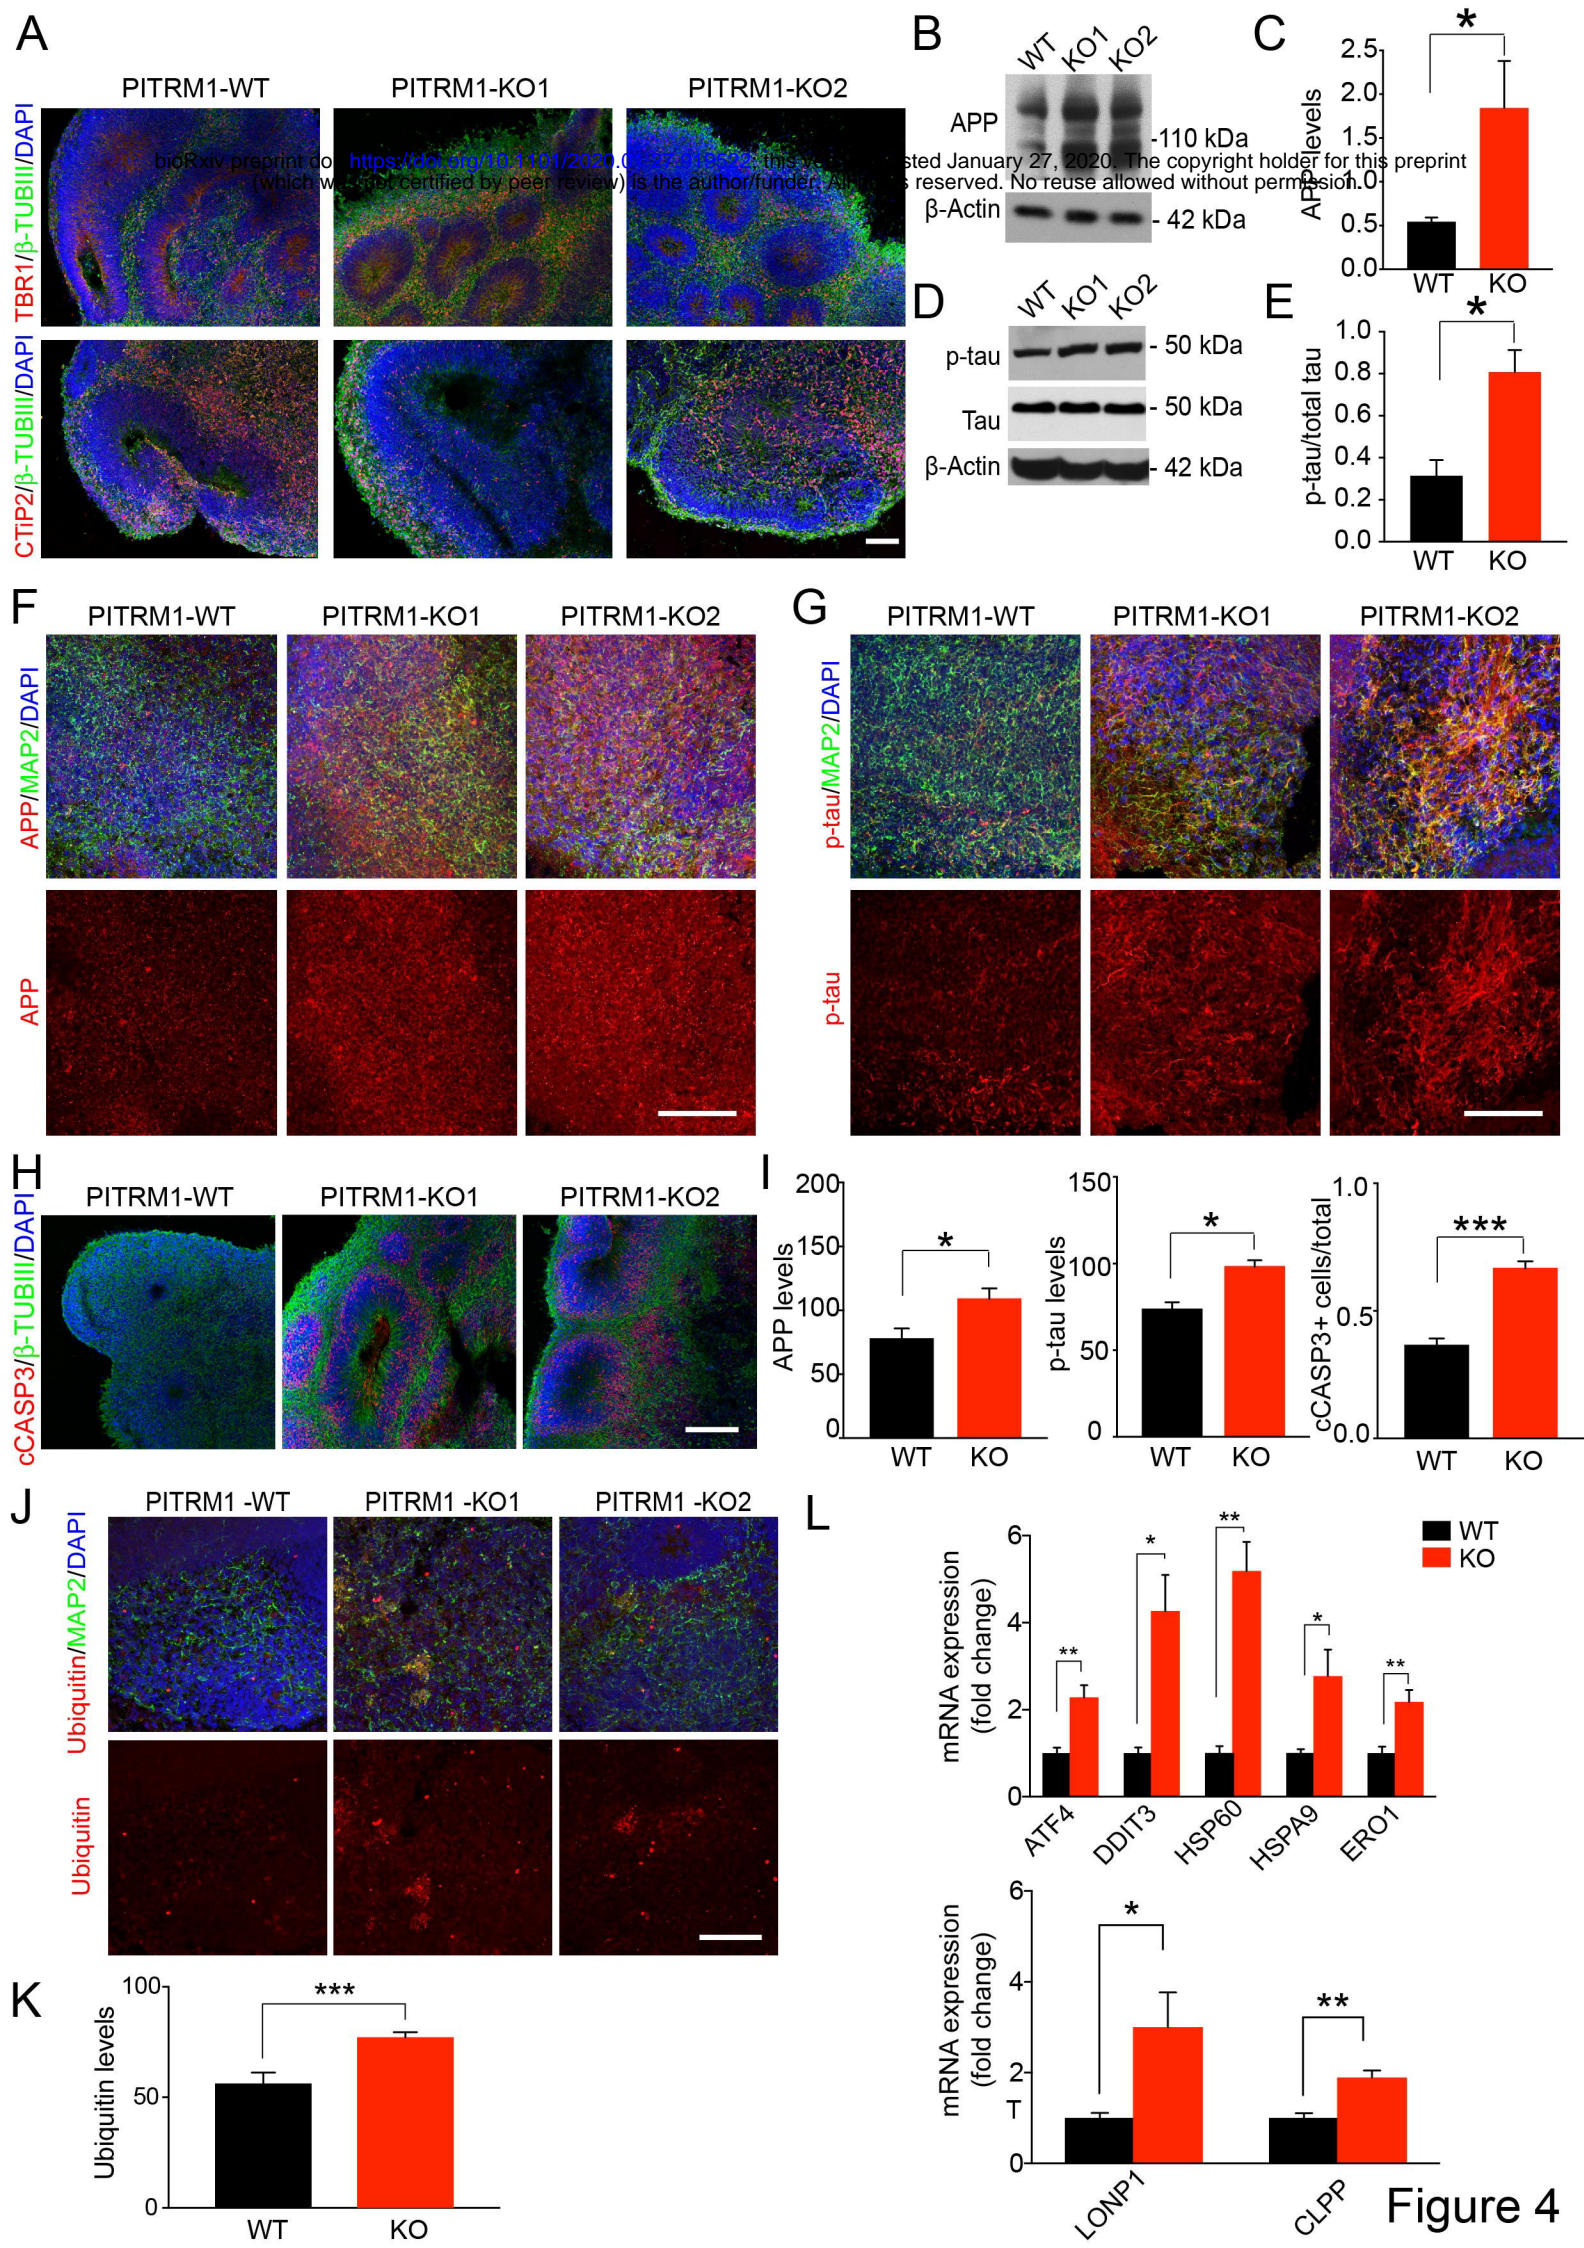

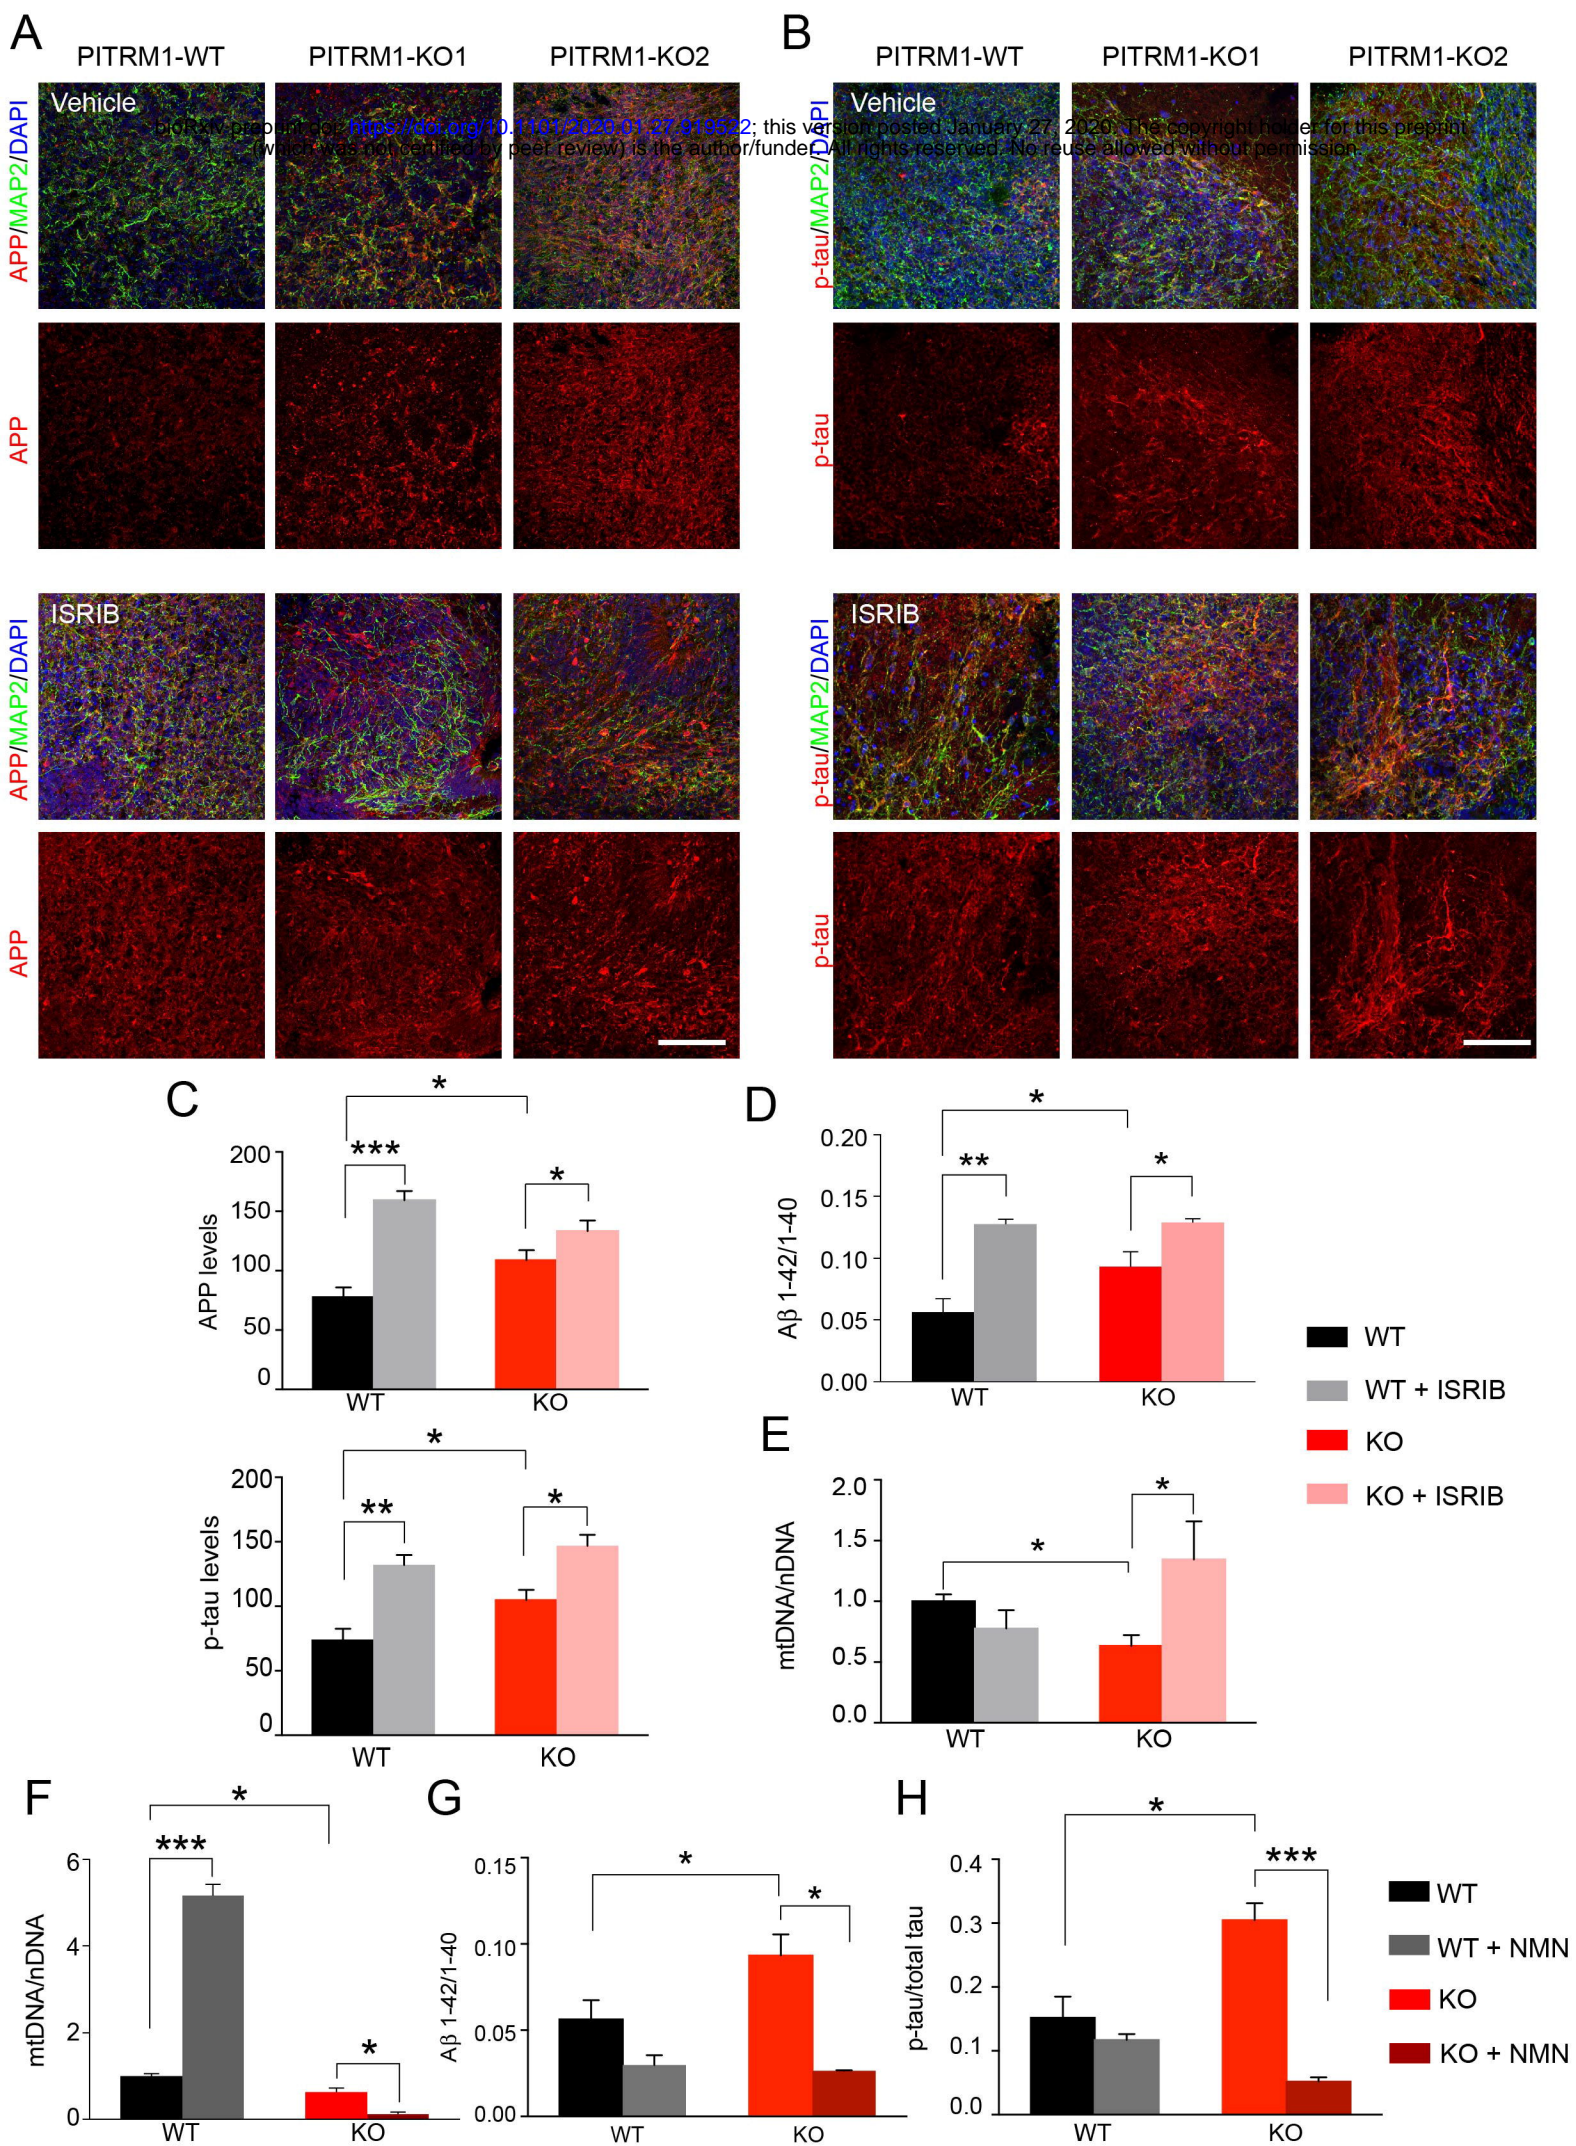

Source: http://biorxiv.org/content/10.1101/2020.01.27.919522v1.full.pdf
